# Supplementary material for: Photoinduced transition-metal and external photosensitizer free cross-coupling of aryl triflates with trialkyl phosphites
Source: Royal Society of Chemistry journal article supplement (doi:10.1039/d1cc03496k), 2021-01-01

## Electronic Supplementary Information

### Table of Contents

|                                                                                               |          |
|-----------------------------------------------------------------------------------------------|----------|
| <b>I. General procedures .....</b>                                                            | <b>1</b> |
| <b>II. General procedures for synthesis of phosphonated products .....</b>                    | <b>1</b> |
| <b>III. Characterization data of compounds.....</b>                                           | <b>1</b> |
| <b>IV. References.....</b>                                                                    | <b>7</b> |
| <b>V. Copies of the <sup>1</sup>H, <sup>13</sup>C NMR and <sup>31</sup>P NMR spectra.....</b> | <b>8</b> |

## I. General procedures

All reagents and solvents were purchased from commercial sources (Adamas-beta, TCI, Acros, Alfa and Ark) and used without further purification unless otherwise stated. All reactions were monitored by thin-layer chromatography (TLC). All reactions were carried out in argon atmosphere unless otherwise stated. Column chromatography was performed on silica gel (200-300 mesh) and visualized with ultraviolet light. Ethyl acetate and petroleum ether were used as eluents.  $^1\text{H}$ ,  $^{13}\text{C}$ ,  $^{31}\text{P}$  and  $^{19}\text{F}$  spectra were taken on Bruker AV400 and Agilent 600. Chemical shifts of  $^1\text{H}$  NMR spectra were reported using the signal of TMS ( $\delta = 0.00$  ppm) as internal standard. Chemical shifts of  $^{13}\text{C}$  NMR spectra were reported using residual solvent signal of  $\text{CDCl}_3$  ( $\delta = 77.2$  ppm) as internal standard. Fourier transform infrared spectra (FT-IR) were recorded on Bruker TENSOR 27 instrument. HRMS analyses were made by Lanzhou University by means of ESI. All solvents were purified and dried by standard techniques.

## II. General procedures for synthesis of phosphonated products

Aryl triflate **1** (0.2 mmol),  $\text{K}_2\text{CO}_3$  (0.4 mmol, 55.2 mg) and TBAI (0.1 mmol, 36.9 mg) were added into  $\text{CH}_3\text{CN}$  (1.0 mL) followed by trialkyl phosphite **2** (0.6 mmol) in an airtight quartz tube, which was then evacuated by four freeze-pump-thaw cycles and back-filled with ultra-purified argon prior to use. The reaction mixture was stirred at room temperature (ca 25 °C) while being irradiated by 254 nm light for 24 h and 2 mL  $\text{H}_2\text{O}$  was added into the reaction solution. The resulting mixture was then extracted with  $3 \times 10$  mL ethyl acetate. The organic layer was washed with saturated NaCl and dried over anhydrous  $\text{Na}_2\text{SO}_4$ . The resulting solution was concentrated under vacuum, and the residue was purified by preparative TLC on silica gel eluting with petroleum ether/ethyl acetate to provide the desired product **3**.

## III. Characterization data of compounds

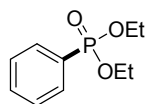

**Diethyl phenylphosphonate (3a)**, colorless oil): 30 mg, 70%.

$^1\text{H}$  NMR (400 MHz,  $\text{CDCl}_3$ )  $\delta$  7.86 – 7.79 (m, 2H), 7.59 – 7.54 (m, 1H), 7.51 – 7.44 (m, 2H), 4.20 – 4.03 (m, 4H), 1.33 (t,  $J = 7.1$  Hz, 6H);

$^{13}\text{C}$  NMR (101 MHz,  $\text{CDCl}_3$ )  $\delta$  132.6 (d,  $J = 3.1$  Hz), 131.9 (d,  $J = 9.9$  Hz), 128.6 (d,  $J = 14.9$  Hz), 128.4 (d,  $J = 188.5$  Hz), 62.3 (d,  $J = 5.4$  Hz), 16.5 (d,  $J = 6.6$  Hz);  $^1\text{H}$  and

<sup>13</sup>C NMR data agreed with those reported in the literature.<sup>[1]</sup>

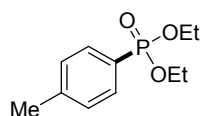

**Diethyl *p*-tolylphosphonate (3b)**, colorless oil): 31 mg, 68%.

<sup>1</sup>H NMR (400 MHz, CDCl<sub>3</sub>) δ 7.70 (dd, *J* = 13.1, 8.1 Hz, 2H), 7.28 (dd, *J* = 7.7, 4.0 Hz, 2H), 4.16 – 4.03 (m, 4H), 2.40 (s, 3H), 1.32 (t, *J* = 7.1 Hz, 6H).

<sup>13</sup>C NMR (101 MHz, CDCl<sub>3</sub>) δ 143.1 (d, *J* = 3.1 Hz), 132.0 (d, *J* = 10.3 Hz), 129.4 (d, *J* = 15.4 Hz), 125.1 (d, *J* = 189.9 Hz), 62.1 (d, *J* = 5.3 Hz), 21.8 (d, *J* = 1.2 Hz), 16.5 (d, *J* = 6.6 Hz); <sup>1</sup>H and <sup>13</sup>C NMR data agreed with those reported in the literature.<sup>[2]</sup>

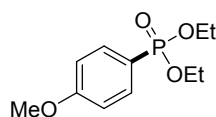

**Diethyl (4-methoxyphenyl)phosphonate (3c)**, colorless oil): 19 mg, 37%.

<sup>1</sup>H NMR (400 MHz, CDCl<sub>3</sub>) δ 7.75 (dd, *J* = 12.7, 8.8 Hz, 2H), 6.97 (dd, *J* = 8.8, 3.4 Hz, 2H), 4.17 – 4.00 (m, 4H), 3.85 (s, 3H), 1.31 (t, *J* = 7.1 Hz, 6H).

<sup>13</sup>C NMR (101 MHz, CDCl<sub>3</sub>) δ 163.0 (d, *J* = 3.4 Hz), 133.9 (d, *J* = 11.4 Hz), 119.6 (d, *J* = 194.7 Hz), 114.1 (d, *J* = 16.0 Hz), 62.1 (d, *J* = 5.2 Hz), 55.5, 16.5 (d, *J* = 6.6 Hz); <sup>1</sup>H and <sup>13</sup>C NMR data agreed with those reported in the literature.<sup>[1]</sup>

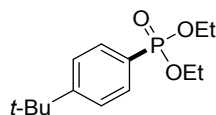

**Diethyl (4-(*tert*-butyl)phenyl)phosphonate (3d)**, colorless oil): 37 mg, 68%.

<sup>1</sup>H NMR (400 MHz, CDCl<sub>3</sub>) δ 7.74 (dd, *J* = 13.0, 8.4 Hz, 2H), 7.48 (dd, *J* = 8.4, 3.9 Hz, 2H), 4.17 – 4.06 (m, 4H), 1.33 (s, 9H), 1.32 (t, *J* = 7.1 Hz, 6H).

<sup>13</sup>C NMR (101 MHz, CDCl<sub>3</sub>) δ 156.1 (d, *J* = 3.2 Hz), 131.8 (d, *J* = 10.3 Hz), 125.6 (d, *J* = 15.2 Hz), 125.2 (d, *J* = 190.2 Hz), 62.1 (d, *J* = 5.4 Hz), 35.2, 31.2, 16.5 (d, *J* = 6.6 Hz); <sup>1</sup>H and <sup>13</sup>C NMR data agreed with those reported in the literature.<sup>[3]</sup>

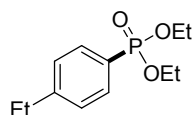

**Diethyl (4-ethylphenyl)phosphonate (3e)**, colorless oil): 32 mg, 67%.

<sup>1</sup>H NMR (400 MHz, CDCl<sub>3</sub>) δ 7.73 (dd, *J* = 13.1, 8.2 Hz, 2H), 7.30 (dd, *J* = 8.3, 4.0 Hz, 2H), 4.19 – 4.01 (m, 4H), 2.70 (q, *J* = 7.6 Hz, 2H), 1.32 (t, *J* = 7.1 Hz, 6H), 1.25 (t, *J* = 7.6 Hz, 3H).

<sup>13</sup>C NMR (101 MHz, CDCl<sub>3</sub>) δ 149.2 (d, *J* = 3.1 Hz), 132.1 (d, *J* = 10.3 Hz), 128.2 (d,

$J = 15.4$  Hz), 125.3 (d,  $J = 189.9$  Hz), 62.1 (d,  $J = 5.4$  Hz), 29.1, 16.5 (d,  $J = 6.6$  Hz), 15.3;  $^1\text{H}$  and  $^{13}\text{C}$  NMR data agreed with those reported in the literature.<sup>[1]</sup>

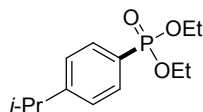

**Diethyl (4-isopropylphenyl)phosphonate (3f)**, colorless oil): 37 mg, 72%.

$^1\text{H}$  NMR (400 MHz,  $\text{CDCl}_3$ )  $\delta$  7.73 (dd,  $J = 13.1, 8.2$  Hz, 2H), 7.32 (dd,  $J = 8.0, 4.0$  Hz, 2H), 4.15 – 4.05 (m, 4H), 2.98 – 2.90 (m, 1H), 1.32 (t,  $J = 7.1$  Hz, 6H), 1.26 (d,  $J = 6.9$  Hz, 6H).

$^{13}\text{C}$  NMR (101 MHz,  $\text{CDCl}_3$ )  $\delta$  153.8 (d,  $J = 3.1$  Hz), 132.1 (d,  $J = 10.3$  Hz), 126.8 (d,  $J = 15.3$  Hz), 125.5 (d,  $J = 190.0$  Hz), 62.1 (d,  $J = 5.3$  Hz), 34.4, 23.8, 16.5 (d,  $J = 6.6$  Hz);  $^1\text{H}$  and  $^{13}\text{C}$  NMR data agreed with those reported in the literature.<sup>[3]</sup>

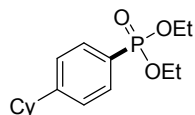

**Diethyl (4-cyclohexylphenyl)phosphonate (3g)**, colorless oil): 39 mg, 66%.

$^1\text{H}$  NMR (400 MHz,  $\text{CDCl}_3$ )  $\delta$  7.72 (dd,  $J = 13.1, 8.2$  Hz, 2H), 7.30 (dd,  $J = 8.2, 4.2$  Hz, 2H), 4.19 – 4.01 (m, 4H), 2.54 (dd,  $J = 11.3, 8.5$  Hz, 1H), 1.85 (t,  $J = 6.3$  Hz, 4H), 1.76 (d,  $J = 12.4$  Hz, 1H), 1.44 – 1.37 (m, 4H), 1.32 (t,  $J = 7.1$  Hz, 6H), 1.28 – 1.23 (m, 1H).

$^{13}\text{C}$  NMR (101 MHz,  $\text{CDCl}_3$ )  $\delta$  152.80 (d,  $J = 3.1$  Hz), 131.88 (d,  $J = 10.3$  Hz), 127.05 (d,  $J = 15.3$  Hz), 125.27 (d,  $J = 189.9$  Hz), 61.96 (d,  $J = 5.3$  Hz), 44.68 (s), 34.10 (s), 26.72 (s), 26.02 (s), 16.34 (d,  $J = 6.6$  Hz);  $^1\text{H}$  and  $^{13}\text{C}$  NMR data agreed with those reported in the literature.<sup>[4]</sup>

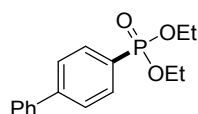

**Diethyl [1,1'-biphenyl]-4-ylphosphonate (3h)**, colorless oil): 17 mg, 30%.

$^1\text{H}$  NMR (400 MHz,  $\text{CDCl}_3$ )  $\delta$  7.88 (dd,  $J = 13.0, 8.3$  Hz, 2H), 7.71 – 7.66 (m, 2H), 7.63 – 7.58 (m, 2H), 7.46 (t,  $J = 7.5$  Hz, 2H), 7.39 (t,  $J = 7.3$  Hz, 1H), 4.23 – 4.06 (m, 4H), 1.35 (t,  $J = 7.1$  Hz, 6H);

$^{13}\text{C}$  NMR (101 MHz,  $\text{CDCl}_3$ )  $\delta$  145.3 (d,  $J = 3.2$  Hz), 140.1, 132.4 (d,  $J = 10.2$  Hz), 129.1, 128.3, 127.5, 127.4, 127.3, 127.2 (d,  $J = 190.5$  Hz), 62.3 (d,  $J = 5.4$  Hz), 16.5 (d,  $J = 6.5$  Hz);  $^1\text{H}$  and  $^{13}\text{C}$  NMR data agreed with those reported in the literature.<sup>[5]</sup>

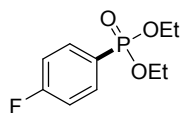

**Diethyl (4-fluorophenyl)phosphonate (3i)**, colorless oil): 17 mg, 36%.

$^1\text{H NMR}$  (400 MHz,  $\text{CDCl}_3$ )  $\delta$  7.86 – 7.79 (m, 2H), 7.16 (td,  $J = 8.8, 3.2$  Hz, 2H), 4.20 – 4.03 (m, 4H), 1.33 (t,  $J = 7.1$  Hz, 6H).

$^{13}\text{C NMR}$  (101 MHz,  $\text{CDCl}_3$ )  $\delta$  165.5 (dd,  $J = 253.5, 4.0$  Hz), 134.5 (dd,  $J = 11.3, 8.9$  Hz), 124.6 (dd,  $J = 192.7, 3.4$  Hz), 116.0 (dd,  $J = 21.4, 16.3$  Hz), 62.3 (d,  $J = 5.4$  Hz), 16.4 (d,  $J = 6.5$  Hz);  $^1\text{H}$  and  $^{13}\text{C}$  NMR data agreed with those reported in the literature.<sup>[6]</sup>

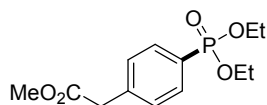

**Methyl 2-(4-(diethoxyphosphoryl)phenyl)acetate (3j)**, colorless oil): 42 mg, 74%.

$^1\text{H NMR}$  (400 MHz,  $\text{CDCl}_3$ )  $\delta$  7.78 (dd,  $J = 13.1, 8.0$  Hz, 2H), 7.39 (dd,  $J = 8.0, 3.8$  Hz, 2H), 4.19 – 4.02 (m, 4H), 3.71 (s, 3H), 3.68 (s, 2H), 1.32 (t,  $J = 7.1$  Hz, 6H).

$^{13}\text{C NMR}$  (101 MHz,  $\text{CDCl}_3$ )  $\delta$  171.4, 138.7 (d,  $J = 3.3$  Hz), 132.3 (d,  $J = 10.3$  Hz), 129.6 (d,  $J = 15.3$  Hz), 127.3 (d,  $J = 189.4$  Hz), 62.3 (d,  $J = 5.4$  Hz), 52.4, 41.3, 16.5 (d,  $J = 6.6$  Hz).

$^{31}\text{P NMR}$  (162 MHz,  $\text{CDCl}_3$ )  $\delta$  18.7.

**HRMS (ESI)**: calcd. for  $\text{C}_{13}\text{H}_{20}\text{O}_5\text{P}$  ( $[\text{M}+\text{H}]^+$ ): 286.1043, found: 286.1040.

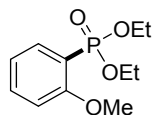

**Diethyl (2-methoxyphenyl)phosphonate (3k)**, colorless oil): 27 mg, 55%.

$^1\text{H NMR}$  (400 MHz,  $\text{CDCl}_3$ )  $\delta$  7.82 (dd,  $J = 14.8, 7.5$  Hz, 1H), 7.51 (t,  $J = 7.8$  Hz, 1H), 7.01 (t,  $J = 7.4$  Hz, 1H), 6.95 (t,  $J = 7.5$  Hz, 1H), 4.23 – 4.08 (m, 4H), 3.90 (s, 3H), 1.34 (t,  $J = 7.0$  Hz, 6H).

$^{13}\text{C NMR}$  (101 MHz,  $\text{CDCl}_3$ )  $\delta$  161.4 (d,  $J = 2.7$  Hz), 135.2 (d,  $J = 7.0$  Hz), 134.4 (d,  $J = 2.1$  Hz), 120.5 (d,  $J = 14.5$  Hz), 116.7 (d,  $J = 187.4$  Hz), 111.3 (d,  $J = 9.4$  Hz), 62.2 (d,  $J = 5.5$  Hz), 55.9, 16.5 (d,  $J = 6.5$  Hz);  $^1\text{H}$  and  $^{13}\text{C}$  NMR data agreed with those reported in the literature.<sup>[7]</sup>

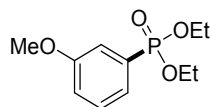

**Diethyl (3-methoxyphenyl)phosphonate (3l)**, colorless oil): 29 mg, 59%.

$^1\text{H NMR}$  (400 MHz,  $\text{CDCl}_3$ )  $\delta$  7.40 – 7.32 (m, 3H), 7.10 – 7.07 (m, 1H), 4.20 – 4.03

(m, 4H), 3.85 (s, 3H), 1.33 (t,  $J = 7.1$  Hz, 6H).

$^{13}\text{C}$  NMR (101 MHz,  $\text{CDCl}_3$ )  $\delta$  159.6 (d,  $J = 18.8$  Hz), 129.9 (d,  $J = 17.6$  Hz), 129.7 (d,  $J = 186.7$  Hz), 124.1 (d,  $J = 9.2$  Hz), 118.9 (d,  $J = 3.2$  Hz), 116.5 (d,  $J = 11.4$  Hz), 62.3 (d,  $J = 5.4$  Hz), 55.6, 16.5 (d,  $J = 6.5$  Hz);  $^1\text{H}$  and  $^{13}\text{C}$  NMR data agreed with those reported in the literature.<sup>[8]</sup>

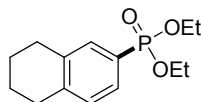

**Diethyl (5,6,7,8-tetrahydronaphthalen-2-yl)phosphonate (3m)**, colorless oil): 31 mg, 58%.

$^1\text{H}$  NMR (400 MHz,  $\text{CDCl}_3$ )  $\delta$  7.64 – 7.55 (m, 2H), 7.15 (dd,  $J = 7.7, 4.5$  Hz, 1H), 4.18 – 4.01 (m, 4H), 2.80 (s, 4H), 1.82 – 1.79 (m, 4H), 1.32 (t,  $J = 7.1$  Hz, 6H).

$^{13}\text{C}$  NMR (101 MHz,  $\text{CDCl}_3$ )  $\delta$  142.4 (d,  $J = 3.3$  Hz), 137.7 (d,  $J = 15.0$  Hz), 132.9 (d,  $J = 10.4$  Hz), 129.5 (d,  $J = 15.5$  Hz), 128.7 (d,  $J = 9.9$  Hz), 124.9 (d,  $J = 188.8$  Hz), 62.1 (d,  $J = 5.3$  Hz), 29.6 (d,  $J = 35.8$  Hz), 23.0 (d,  $J = 11.4$  Hz), 16.5 (d,  $J = 6.6$  Hz);  $^1\text{H}$  and  $^{13}\text{C}$  NMR data agreed with those reported in the literature.<sup>[9]</sup>

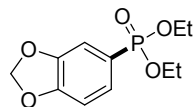

**Diethyl benzo[d][1,3]dioxol-5-ylphosphonate (3n)**, colorless oil): 31 mg, 60%.

$^1\text{H}$  NMR (400 MHz,  $\text{CDCl}_3$ )  $\delta$  7.38 (ddd,  $J = 14.0, 7.9, 1.4$  Hz, 1H), 7.21 (dd,  $J = 12.9, 1.3$  Hz, 1H), 6.89 (dd,  $J = 7.9, 3.6$  Hz, 1H), 6.03 (s, 2H), 4.18 – 4.01 (m, 4H), 1.32 (t,  $J = 7.1$  Hz, 6H).

$^{13}\text{C}$  NMR (101 MHz,  $\text{CDCl}_3$ )  $\delta$  151.3 (d,  $J = 3.5$  Hz), 148.0 (d,  $J = 22.6$  Hz), 127.6 (d,  $J = 11.1$  Hz), 121.4 (d,  $J = 193.4$  Hz), 111.4 (d,  $J = 12.3$  Hz), 108.7 (d,  $J = 18.7$  Hz), 101.7, 62.2 (d,  $J = 5.3$  Hz), 16.5 (d,  $J = 6.6$  Hz);  $^1\text{H}$  and  $^{13}\text{C}$  NMR data agreed with those reported in the literature.<sup>[9]</sup>

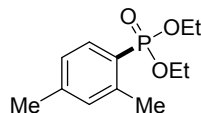

**Diethyl (2,4-dimethylphenyl)phosphonate (3o)**, colorless oil): 30 mg, 62%.

$^1\text{H}$  NMR (400 MHz,  $\text{CDCl}_3$ )  $\delta$  7.80 (dd,  $J = 14.1, 8.3$  Hz, 1H), 7.08 (d,  $J = 5.9$  Hz, 2H), 4.19 – 4.01 (m, 4H), 2.53 (d,  $J = 1.2$  Hz, 3H), 2.35 (s, 3H), 1.32 (t,  $J = 7.1$  Hz, 6H).

$^{13}\text{C}$  NMR (101 MHz,  $\text{CDCl}_3$ )  $\delta$  143.1 (d,  $J = 3.0$  Hz), 141.8 (d,  $J = 10.6$  Hz), 134.3 (d,  $J = 10.7$  Hz), 132.2 (d,  $J = 15.3$  Hz), 126.3 (d,  $J = 15.3$  Hz), 123.7 (d,  $J = 186.1$  Hz), 61.9 (d,  $J = 5.4$  Hz), 21.6 (d,  $J = 1.2$  Hz), 21.3 (d,  $J = 3.6$  Hz), 16.5 (d,  $J = 6.6$  Hz);  $^1\text{H}$

and  $^{13}\text{C}$  NMR data agreed with those reported in the literature.<sup>[9]</sup>

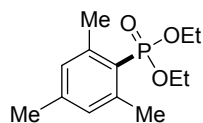

**Diethyl mesitylphosphonate (3p, colorless oil):** 16 mg, 32%.

$^1\text{H}$  NMR (400 MHz,  $\text{CDCl}_3$ )  $\delta$  6.90 (d,  $J = 4.5$  Hz, 2H), 4.39 – 3.89 (m, 4H), 2.60 (d,  $J = 1.5$  Hz, 6H), 2.28 (s, 3H), 1.31 (t,  $J = 7.1$  Hz, 6H).

$^{13}\text{C}$  NMR (101 MHz,  $\text{CDCl}_3$ )  $\delta$  144.0 (d,  $J = 12.0$  Hz), 142.0 (d,  $J = 3.1$  Hz), 130.5 (d,  $J = 15.8$  Hz), 122.3 (d,  $J = 181.9$  Hz), 61.3 (d,  $J = 5.3$  Hz), 23.3 (d,  $J = 2.8$  Hz), 21.2, 16.46 (d,  $J = 6.7$  Hz);  $^1\text{H}$  and  $^{13}\text{C}$  NMR data agreed with those reported in the literature.<sup>[7]</sup>

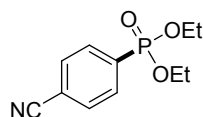

**Diethyl (4-cyanophenyl)phosphonate (3q, colorless oil):** 25 mg, 64%.

$^1\text{H}$  NMR (400 MHz,  $\text{CDCl}_3$ )  $\delta$  7.93 (dd,  $J = 13.1, 8.4$  Hz, 2H), 7.77 (dd,  $J = 8.4, 3.6$  Hz, 2H), 4.24 – 4.07 (m, 4H), 1.34 (t,  $J = 7.1$  Hz, 6H).

$^{13}\text{C}$  NMR (101 MHz,  $\text{CDCl}_3$ )  $\delta$  134.1 (d,  $J = 187.7$  Hz), 132.4 (d,  $J = 9.8$  Hz), 132.1 (d,  $J = 14.9$  Hz), 117.9, 116.1 (d,  $J = 3.6$  Hz), 62.8 (d,  $J = 5.6$  Hz), 16.5 (d,  $J = 6.3$  Hz);  $^1\text{H}$  and  $^{13}\text{C}$  NMR data agreed with those reported in the literature.<sup>[9]</sup>

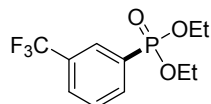

**Diethyl (3-(trifluoromethyl)phenyl)phosphonate (3r, colorless oil):** 33 mg, 58%.

$^1\text{H}$  NMR (400 MHz,  $\text{CDCl}_3$ )  $\delta$  8.08 (d,  $J = 13.7$  Hz, 1H), 8.01 (dd,  $J = 13.0, 7.6$  Hz, 1H), 7.81 (d,  $J = 7.9$  Hz, 1H), 7.62 (td,  $J = 7.7, 3.9$  Hz, 1H), 4.25 – 4.07 (m, 4H), 1.35 (t,  $J = 7.1$  Hz, 6H).

$^{13}\text{C}$  NMR (101 MHz,  $\text{CDCl}_3$ )  $\delta$  135.1 (d,  $J = 8.6$  Hz), 131.4 – 130.9 (m), 129.28 (s), 129.20 – 129.1 (m), 128.7 (dq,  $J = 11.3, 3.8$  Hz), 123.8 (qd,  $J = 272.6, 2.6$  Hz), 62.7 (d,  $J = 5.6$  Hz), 16.4 (d,  $J = 6.4$  Hz);  $^1\text{H}$  and  $^{13}\text{C}$  NMR data agreed with those reported in the literature.<sup>[6]</sup>

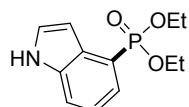

**Diethyl (1H-indol-4-yl)phosphonate (3s, colorless oil):** 24 mg, 47%.

**<sup>1</sup>H NMR** (600 MHz, CDCl<sub>3</sub>) δ 8.74 (d, *J* = 8.2 Hz, 1H), 8.67 (s, 1H), 7.93 (dd, *J* = 14.9, 7.3 Hz, 1H), 7.65 (d, *J* = 8.2 Hz, 1H), 7.50 – 7.43 (m, 3H), 7.32 – 7.23 (m, 2H), 4.32 – 4.19 (m, 2H), 4.16 – 4.06 (m, 2H), 1.29 (t, *J* = 7.1 Hz, 6H).

**<sup>13</sup>C NMR** (151 MHz, CDCl<sub>3</sub>) δ 135.94 (d, *J* = 16.7 Hz), 128.73 (d, *J* = 11.9 Hz), 126.27 (d, *J* = 10.2 Hz), 126.09, 121.30 (d, *J* = 16.2 Hz), 118.47 (d, *J* = 187.6 Hz), 115.96 (d, *J* = 3.4 Hz), 103.36 (d, *J* = 2.3 Hz), 62.09 (d, *J* = 4.9 Hz), 16.55 (d, *J* = 6.7 Hz).

**<sup>31</sup>P NMR** (121 MHz, CDCl<sub>3</sub>) δ 21.12.

**HRMS (ESI)**: calcd. for C<sub>12</sub>H<sub>17</sub>NO<sub>3</sub>P ([M+H]<sup>+</sup>): 254.0941, found: 254.0938.

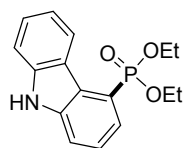

**Diethyl (9H-carbazol-4-yl)phosphonate (3t, colorless oil)**: 24 mg, 39%.

**<sup>1</sup>H NMR** (600 MHz, CDCl<sub>3</sub>) δ 8.74 (d, *J* = 8.2 Hz, 1H), 8.67 (s, 1H), 7.93 (dd, *J* = 14.9, 7.3 Hz, 1H), 7.65 (d, *J* = 8.2 Hz, 1H), 7.53 – 7.43 (m, 3H), 7.34 – 7.22 (m, 2H), 4.28 – 4.19 (m, 2H), 4.16 – 4.07 (m, 2H), 1.29 (t, *J* = 7.1 Hz, 6H).

**<sup>13</sup>C NMR** (151 MHz, CDCl<sub>3</sub>) δ 140.17, 139.92 (d, *J* = 16.9 Hz), 126.87, 126.81, 124.87, 124.86 (d, *J* = 15.8 Hz), 123.34 (d, *J* = 11.6 Hz), 121.85 (d, *J* = 3.1 Hz), 120.31 (d, *J* = 185.2 Hz), 119.86, 115.71 (d, *J* = 3.4 Hz), 110.69, 62.43 (d, *J* = 5.0 Hz), 16.47 (d, *J* = 6.8 Hz).

**<sup>31</sup>P NMR** (121 MHz, CDCl<sub>3</sub>) δ 20.52.

**HRMS (ESI)**: calcd. for C<sub>16</sub>H<sub>19</sub>NO<sub>3</sub>P ([M+H]<sup>+</sup>): 304.1097, found: 304.1094.

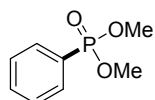

**Dimethyl phenylphosphonate (3u, colorless oil)**: 23 mg, 61%.

**<sup>1</sup>H NMR** (400 MHz, CDCl<sub>3</sub>) δ 7.87 – 7.75 (m, 2H), 7.59 (td, *J* = 7.5, 1.4 Hz, 1H), 7.49 (td, *J* = 7.5, 4.3 Hz, 2H), 3.79 (s, 3H), 3.76 (s, 3H);

**<sup>13</sup>C NMR** (101 MHz, CDCl<sub>3</sub>) δ 132.8 (d, *J* = 3.0 Hz), 132.1 (d, *J* = 9.9 Hz), 128.7 (d, *J* = 15.0 Hz), 127.0 (d, *J* = 188.5 Hz), 52.9 (d, *J* = 5.5 Hz); <sup>1</sup>H and <sup>13</sup>C NMR data agreed with those reported in the literature.<sup>[10]</sup>

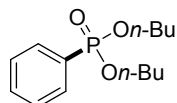

**Dibutyl phenylphosphonate (3v, colorless oil)**: 39 mg, 73%.

**<sup>1</sup>H NMR** (400 MHz, CDCl<sub>3</sub>) δ 7.84 – 7.78 (m, 2H), 7.55 (t, *J* = 7.4 Hz, 1H), 7.47 (dt,



$J = 11.4, 5.7$  Hz, 2H), 4.12 – 3.79 (m, 4H), 1.69 – 1.62 (m, 4H), 1.39 (dq,  $J = 14.6, 7.3$  Hz, 4H), 0.90 (t,  $J = 7.4$  Hz, 6H).

$^{13}\text{C}$  NMR (101 MHz,  $\text{CDCl}_3$ )  $\delta$  132.4 (d,  $J = 3.0$  Hz), 131.9 (d,  $J = 9.7$  Hz), 128.5 (d,  $J = 15.0$  Hz), 128.5 (d,  $J = 188.1$  Hz), 65.8 (d,  $J = 5.7$  Hz), 32.5 (d,  $J = 6.5$  Hz), 18.8, 13.7;  $^1\text{H}$  and  $^{13}\text{C}$  NMR data agreed with those reported in the literature.<sup>[7]</sup>

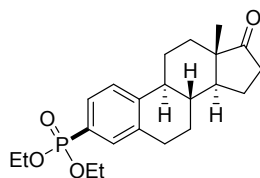

**Diethyl ((8R,9S,13S,14S)-13-methyl-17-oxo-7,8,9,11,12,13,14,15,16,17-decahydro-6H-cyclopenta[a]phenanthren-3-yl)phosphonate (3w, white solid):** 35 mg, 45%.

$^1\text{H}$  NMR (400 MHz,  $\text{CDCl}_3$ ):  $\delta$  7.60 – 7.51 (m, 2H), 7.39 (dd,  $J = 7.8, 4.1$  Hz, 1H), 4.19 – 4.00 (m, 4H), 2.96 (dd,  $J = 9.7, 6.2$  Hz, 2H), 2.52 (dd,  $J = 18.7, 8.7$  Hz, 1H), 2.46 – 2.42 (m, 1H), 2.34 (d,  $J = 7.7$  Hz, 1H), 2.22 – 2.13 (m, 1H), 2.12 – 2.03 (m, 2H), 2.02 – 1.95 (m, 1H), 1.69 – 1.40 (m, 6H), 1.33 (t,  $J = 6.7$  Hz, 6H), 0.92 (s, 3H).

$^{13}\text{C}$  NMR (151 MHz,  $\text{CDCl}_3$ ):  $\delta$  220.4, 144.7 (d,  $J = 2.5$  Hz), 137.1 (d,  $J = 14.6$  Hz), 132.7 (d,  $J = 10.4$  Hz), 129.1 (d,  $J = 9.8$  Hz), 125.7 (d,  $J = 188.4$  Hz), 125.6 (d,  $J = 15.2$  Hz), 62.2 (d,  $J = 4.9$  Hz), 48.0, 44.8, 38.0, 35.9, 31.8, 29.3, 26.4, 25.7, 21.8, 16.5 (d,  $J = 6.3$  Hz), 14.0;  $^1\text{H}$  and  $^{13}\text{C}$  NMR data agreed with those reported in the literature.<sup>[8]</sup>

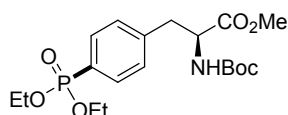

**Methyl (S)-2-((tert-butoxycarbonyl)amino)-3-(4-(diethoxyphosphoryl)-phenyl)propanoate (3x, white solid):** 33 mg, 40%.

$^1\text{H}$  NMR (400 MHz,  $\text{CDCl}_3$ ):  $\delta$  7.74 (dd,  $J = 13.1, 7.9$  Hz, 2H), 7.25 (dd,  $J = 7.6, 3.7$  Hz, 2H), 5.05 (d,  $J = 7.7$  Hz, 1H), 4.62 (dd,  $J = 12.6, 5.7$  Hz, 1H), 4.23 – 3.98 (m, 4H), 3.72 (s, 3H), 3.19 (dd,  $J = 13.8, 5.5$  Hz, 1H), 3.07 (dd,  $J = 13.6, 6.2$  Hz, 1H), 1.41 (s, 9H), 1.32 (t,  $J = 7.1$  Hz, 6H).

$^{13}\text{C}$  NMR (101 MHz,  $\text{CDCl}_3$ ):  $\delta$  172.1, 155.1, 141.0 (d,  $J = 3.0$  Hz), 132.0 (d,  $J = 10.2$  Hz), 129.6 (d,  $J = 15.3$  Hz), 127.1 (d,  $J = 189.7$  Hz), 80.2, 62.2 (d,  $J = 5.5$  Hz), 54.3, 52.5, 38.5, 28.4, 16.4 (d,  $J = 6.5$  Hz);  $^1\text{H}$  and  $^{13}\text{C}$  NMR data agreed with those reported in the literature.<sup>[11]</sup>

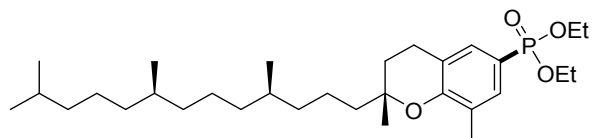

**Diethyl ((*R*)-2,8-dimethyl-2-((*4R,8R*)-4,8,12-trimethyltridecyl)chroman-6-yl)phosphonate (3w, colorless oil ):** 16 mg, 14%.

**<sup>1</sup>H NMR** (600 MHz, CDCl<sub>3</sub>):  $\delta$  7.37 (t,  $J = 14.4$  Hz, 3H), 4.15 – 4.01 (m, 4H), 2.82 – 2.70 (m, 2H), 2.17 (s, 3H), 1.80 (ddt,  $J = 40.8, 13.2, 6.5$  Hz, 2H), 1.62 – 1.55 (m, 3H), 1.55 – 1.43 (m, 2H), 1.32 (t,  $J = 7.0$  Hz, 6H), 1.29 – 1.11 (m, 19H), 0.85 (dd,  $J = 13.5, 6.6$  Hz, 12H).

**<sup>13</sup>C NMR** (151 MHz, CDCl<sub>3</sub>):  $\delta$  156.2 (d,  $J = 3.3$  Hz), 131.7 (t,  $J = 10.5$  Hz), 126.9 (d,  $J = 15.8$  Hz), 120.8 (d,  $J = 16.5$  Hz), 117.1 (d,  $J = 193.7$  Hz), 61.9 (d,  $J = 5.3$  Hz), 40.5, 39.6, 37.6, 37.6, 37.6, 37.5, 32.9, 32.8, 31.0, 29.9, 28.2, 25.0, 24.6, 24.5, 22.9, 22.8, 22.3, 21.1, 19.9, 19.8, 16.6 (d,  $J = 6.6$  Hz), 16.2.

**<sup>31</sup>P NMR** (121 MHz, CDCl<sub>3</sub>):  $\delta$  22.3.

**HRMS (ESI):** calcd. for C<sub>31</sub>H<sub>56</sub>O<sub>4</sub>P ([M+H]<sup>+</sup>): 523.3911, found: 523.3912.

#### IV. References

- [1]. J. Xu, P. Zhang, Y. Gao, Y. Chen, G. Tang and Y. Zhao. *J. Org. Chem.* **2013**, *78*, 8176-8183.
- [2]. T.-H. Chen, D. M. Reddy and C.-F. Lee. *RSC Adv.* **2017**, *7*, 30214-30220.
- [3]. C. Yuan, and H. Feng. *Synthesis.* **1990**, *1990*, 140-141.
- [4]. G. Keglevich, A. Grün, A. Bölskei, L. Drahos, M. Kraszni and G. T. Balogh. *Heteroatom Chem.* **2012**, *23*, 574-582.
- [5]. W. C. Fu, C. M. So and F. Y. Kwong. *Org. Lett.* **2015**, *17*, 5906-5909.
- [6]. R. Berrino, S. Cacchi, G. Fabrizi, A. Goggiamani and P. Stabile. *Org. Biomol. Chem.* **2010**, *8*, 4518-4520.
- [7]. C. Liu, C.-L. Ji, T. Zhou, X. Hong and M. Szostak. *Org. Lett.* **2019**, *21*, 9256-9261.
- [8]. W. Lecroq, P. Bazille, F. Morlet-Savary, M. Breugst, J. Lalevée, A.-C. Gaumont and S. Lakhdar. *Org. Lett.* **2018**, *20*, 4164-4167.
- [9]. W. Xu, J.-P. Zou and W. Zhang. *Tetrahedron Lett.* **2010**, *51*, 2639-2643.
- [10]. S.-Y. Chen, R.-S. Zeng, J.-P. Zou and O. T. Asekun. *J. Org. Chem.* **2014**, *79*, 1449-1453.
- [11]. M. Kalek, M. Jezowska and J. Stawinski. *Adv. Synth. Catal.* **2009**, *351*, 3207-3216.

## V. Copies of the $^1\text{H}$ , $^{13}\text{C}$ NMR and $^{31}\text{P}$ NMR spectra

### $^1\text{H}$ NMR spectrum of compound **3a**

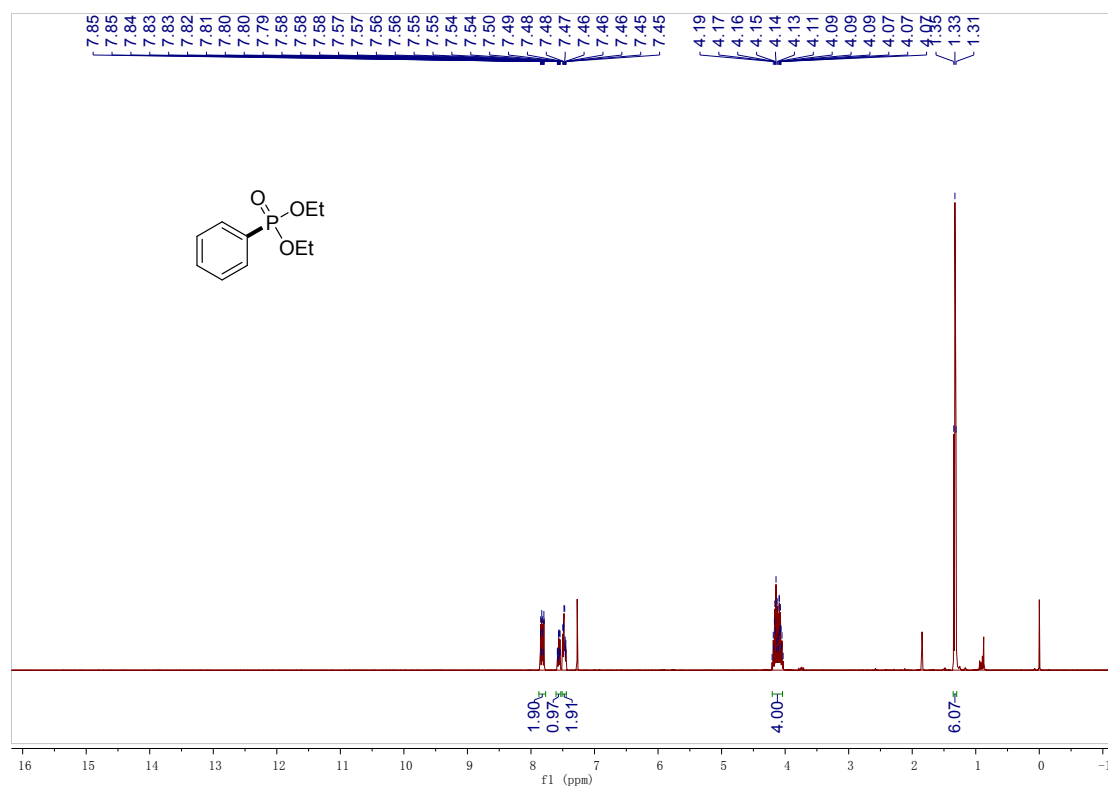

### $^{13}\text{C}$ NMR spectrum of compound **3a**

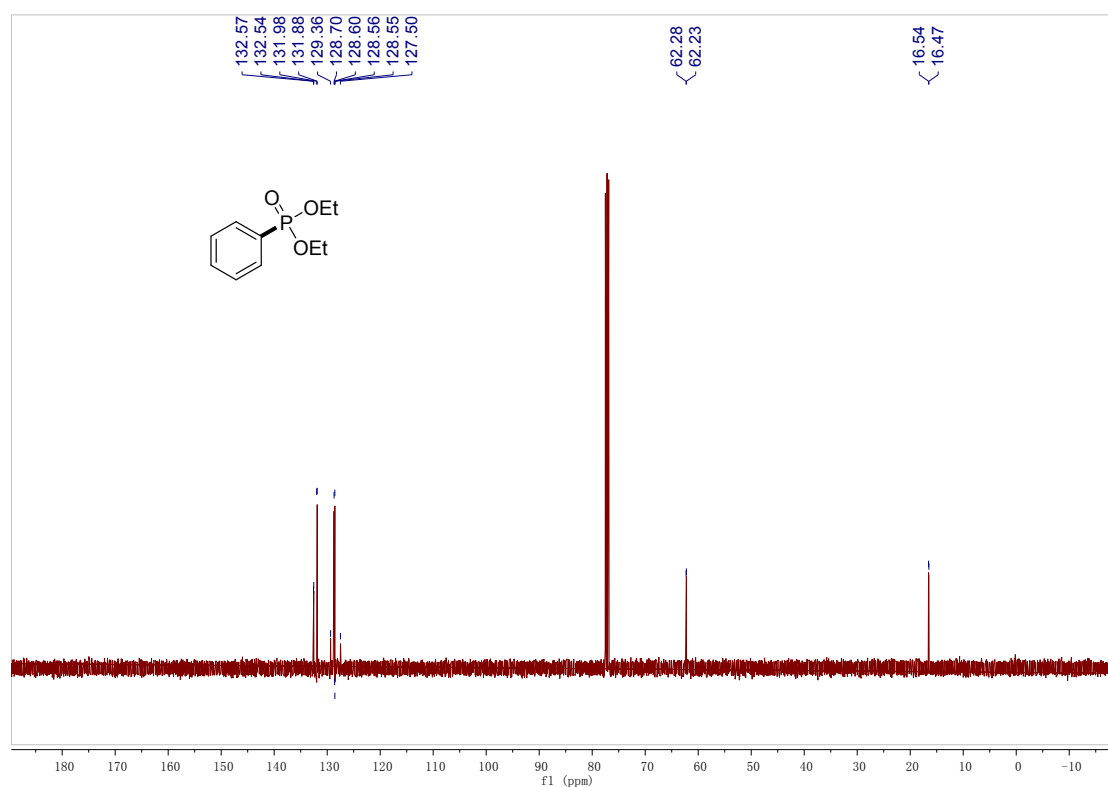

<sup>1</sup>H NMR spectrum of compound **3b**

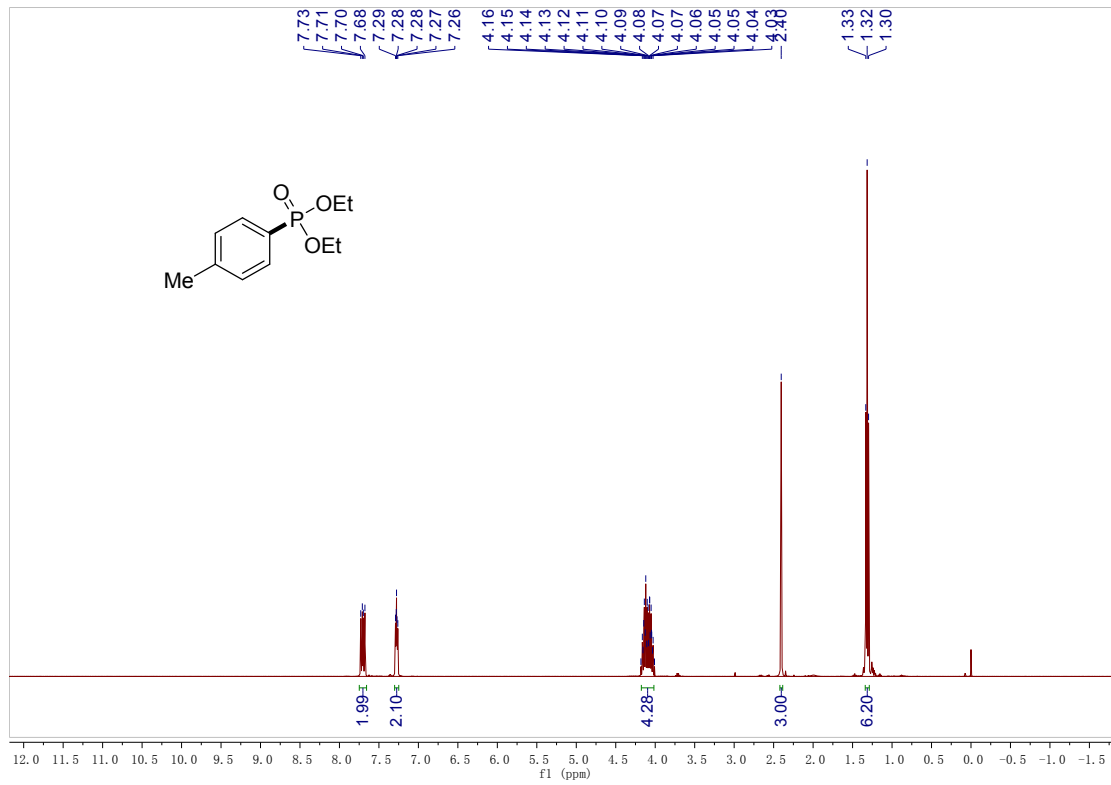

<sup>13</sup>C NMR spectrum of compound **3b**

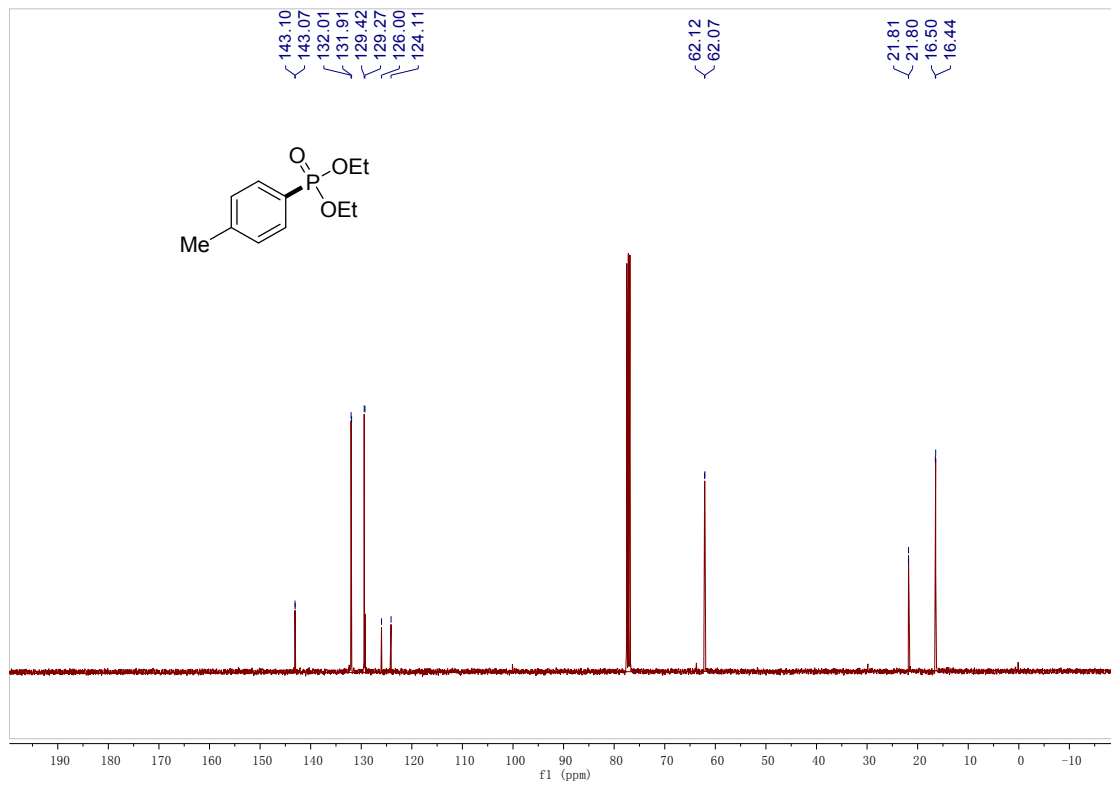

<sup>1</sup>H NMR spectrum of compound **3c**

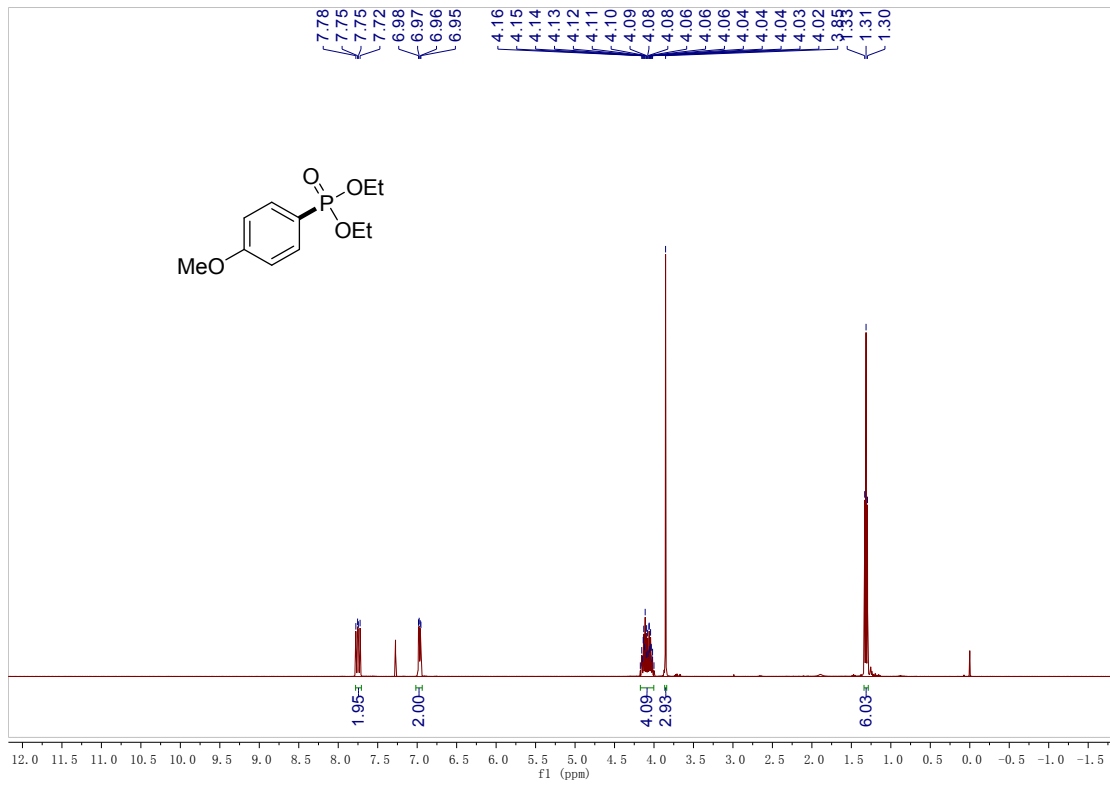

<sup>13</sup>C NMR spectrum of compound **3c**

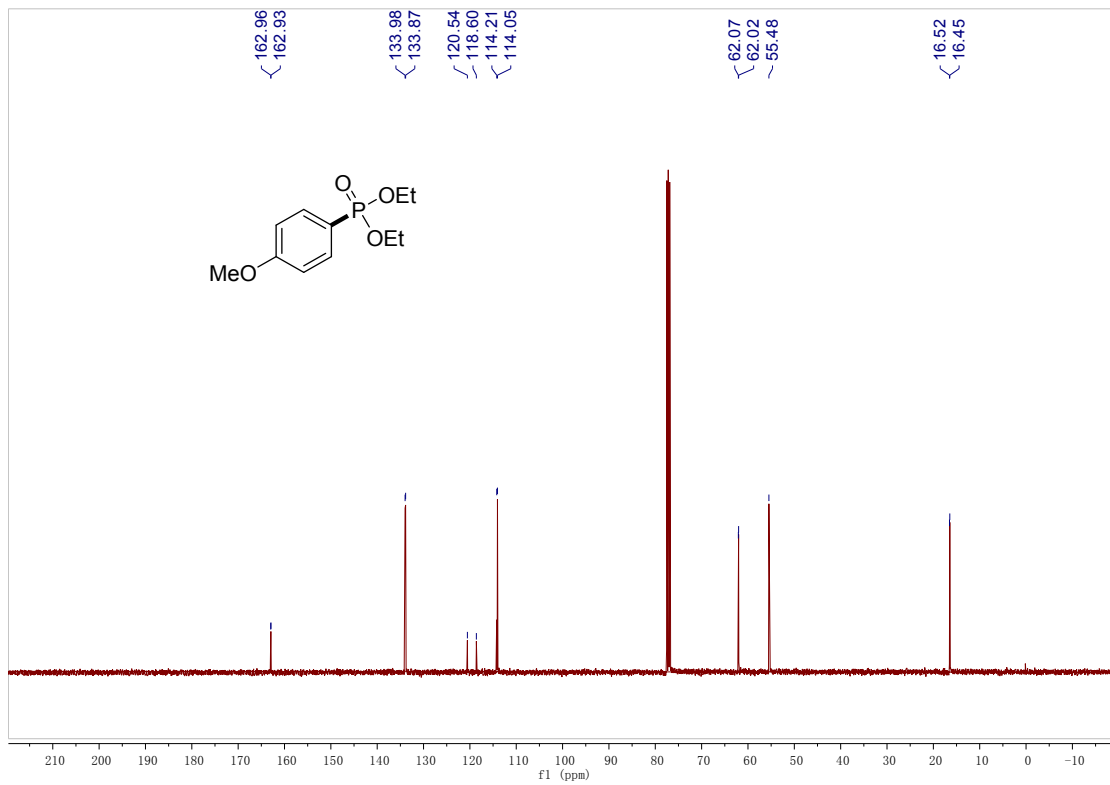

<sup>1</sup>H NMR spectrum of compound **3d**

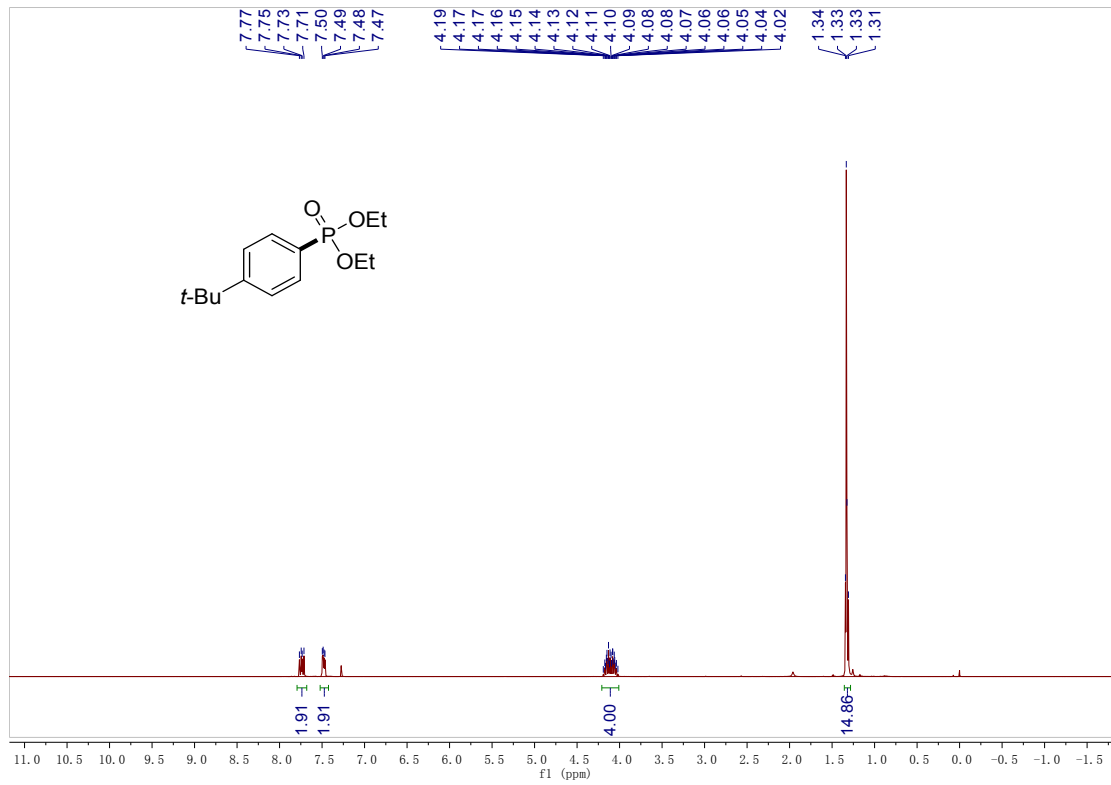

<sup>13</sup>C NMR spectrum of compound **3d**

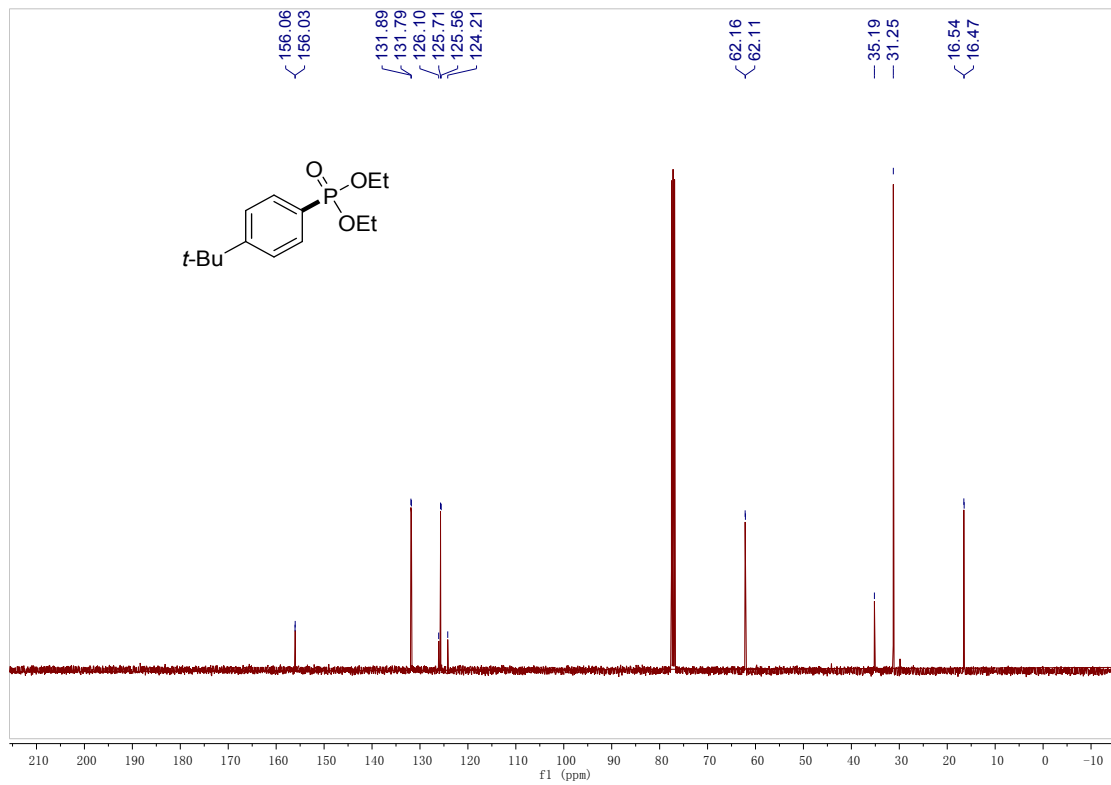

### <sup>1</sup>H NMR spectrum of compound **3e**

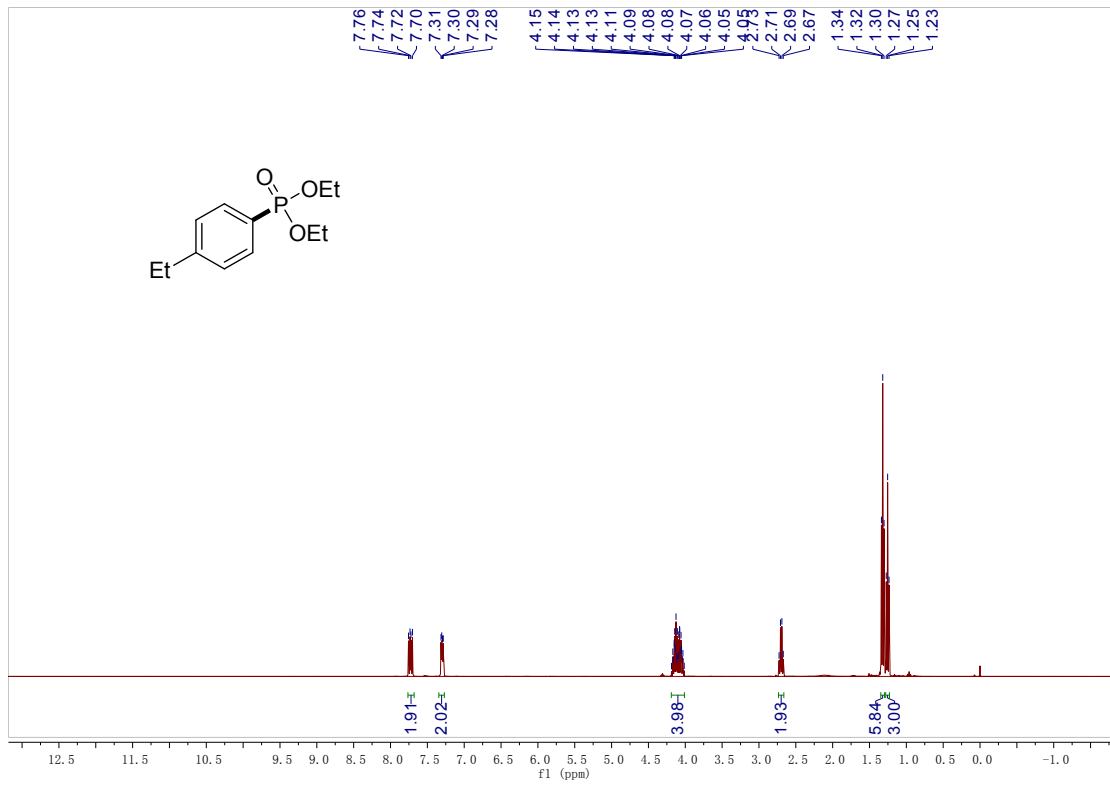

### <sup>13</sup>C NMR spectrum of compound **3e**

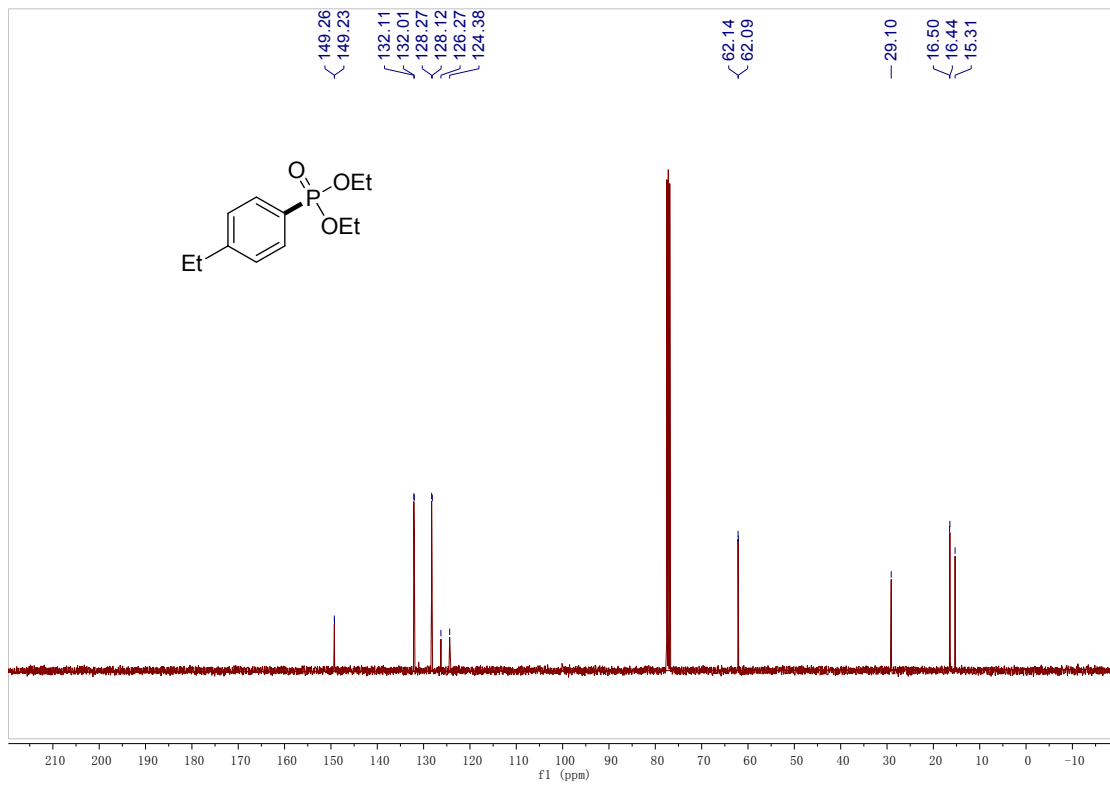



<sup>1</sup>H NMR spectrum of compound **3f**

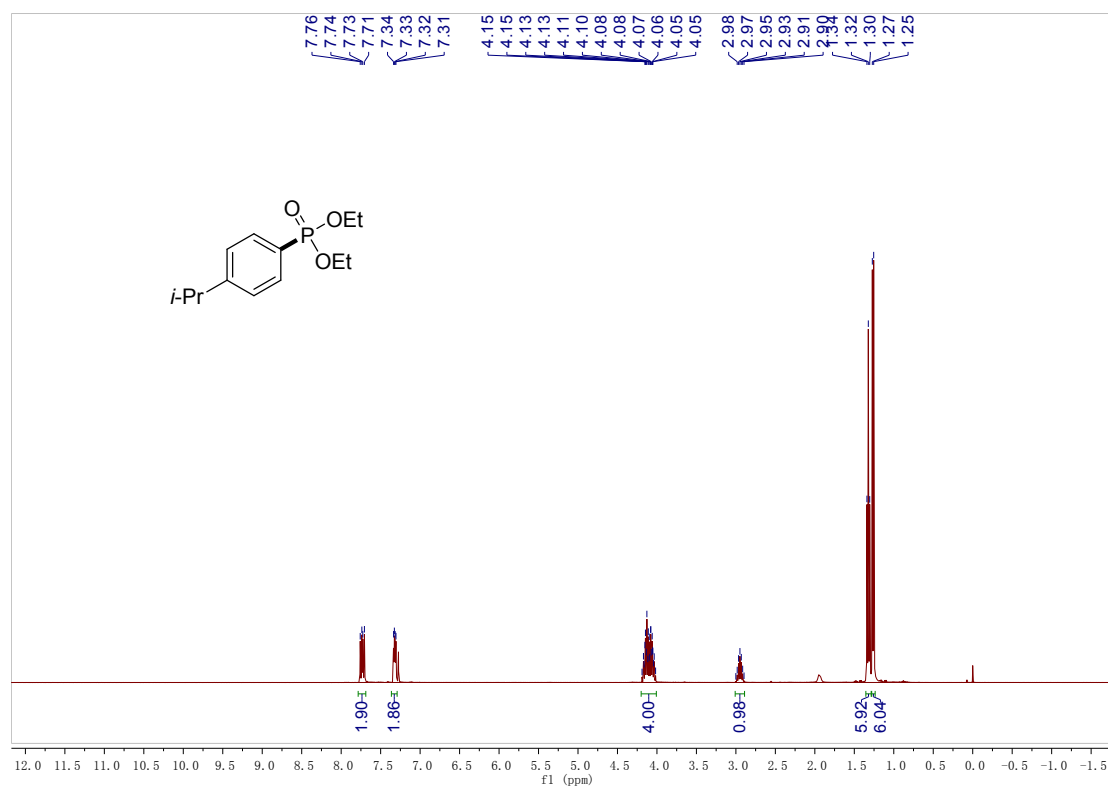

<sup>13</sup>C NMR spectrum of compound **3f**

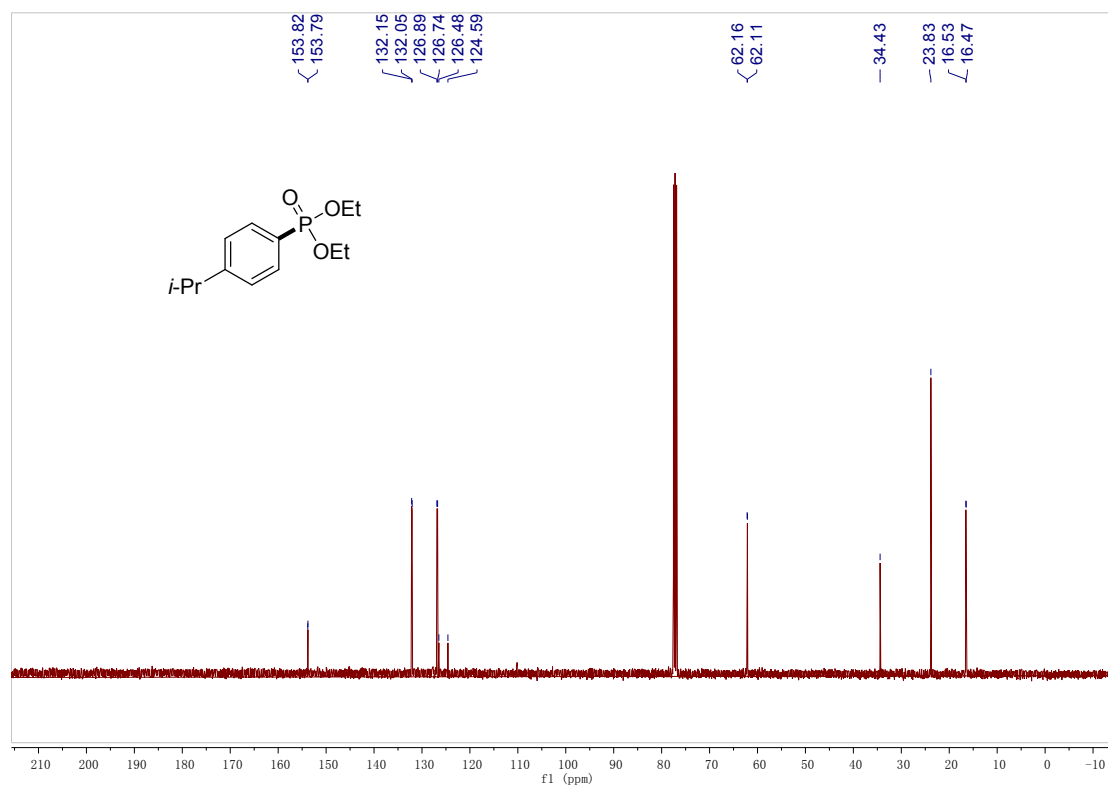

<sup>1</sup>H NMR spectrum of compound **3g**

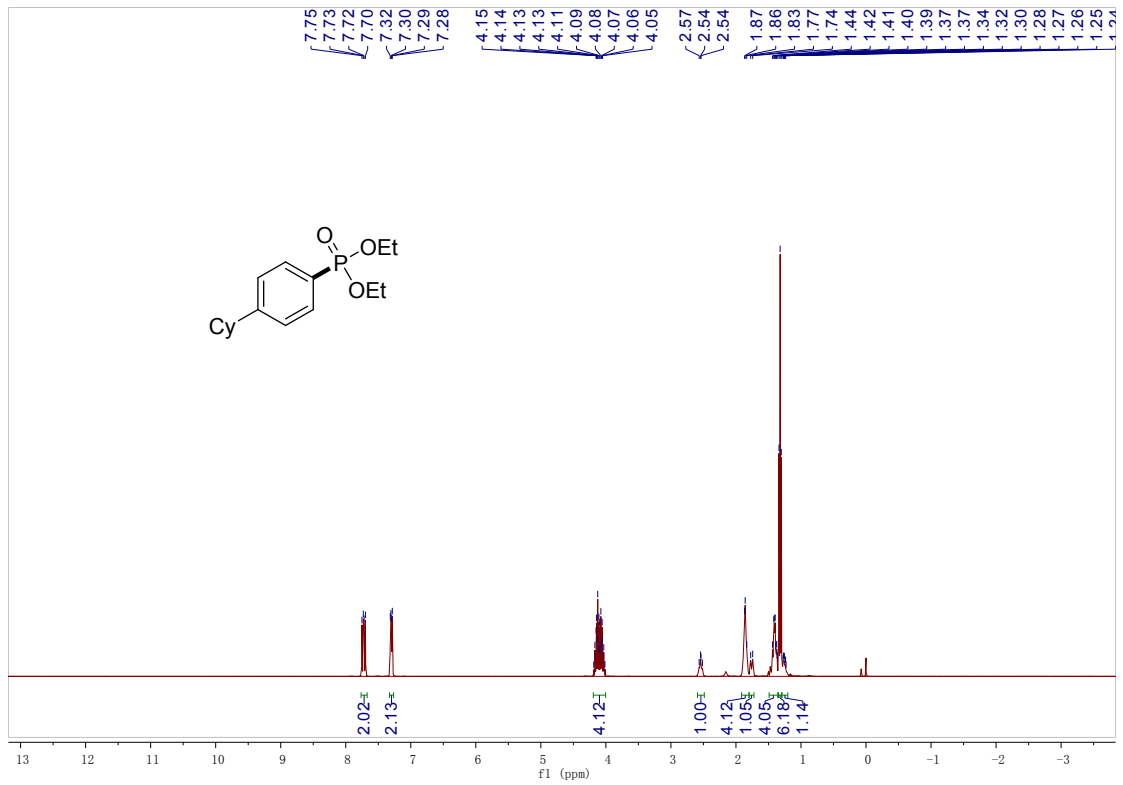

<sup>13</sup>C NMR spectrum of compound **3g**

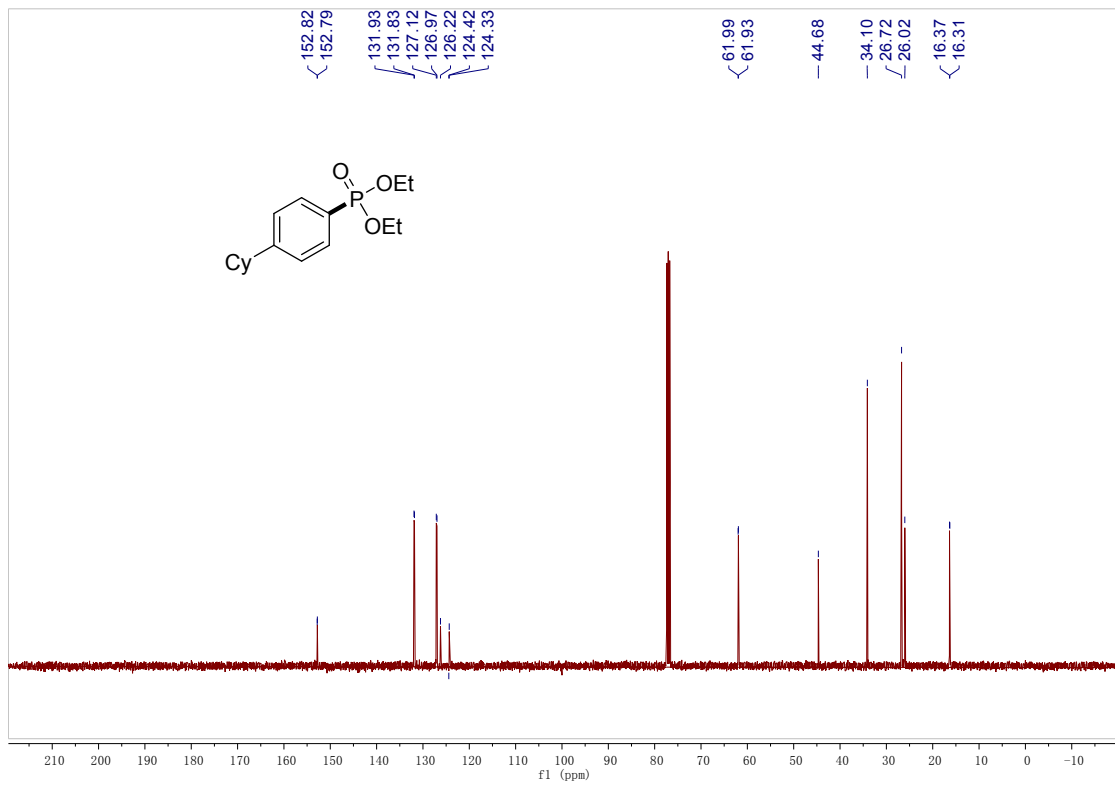

### <sup>1</sup>H NMR spectrum of compound 3h

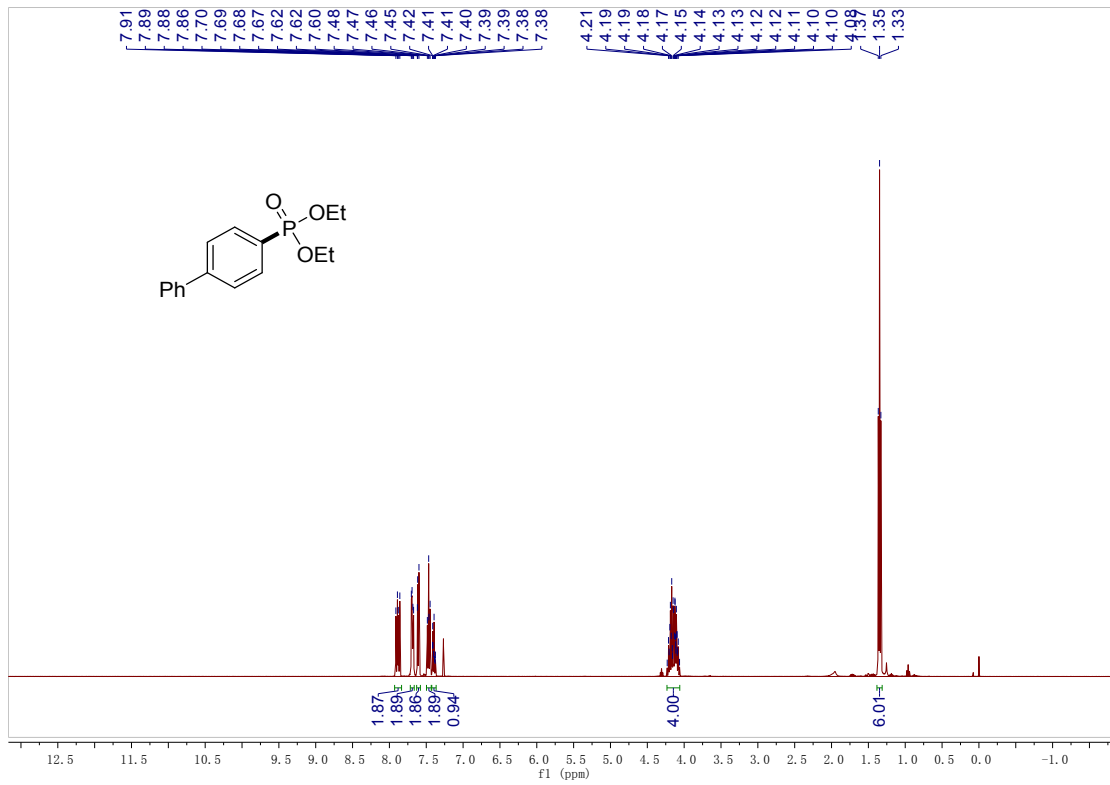

### <sup>13</sup>C NMR spectrum of compound 3h

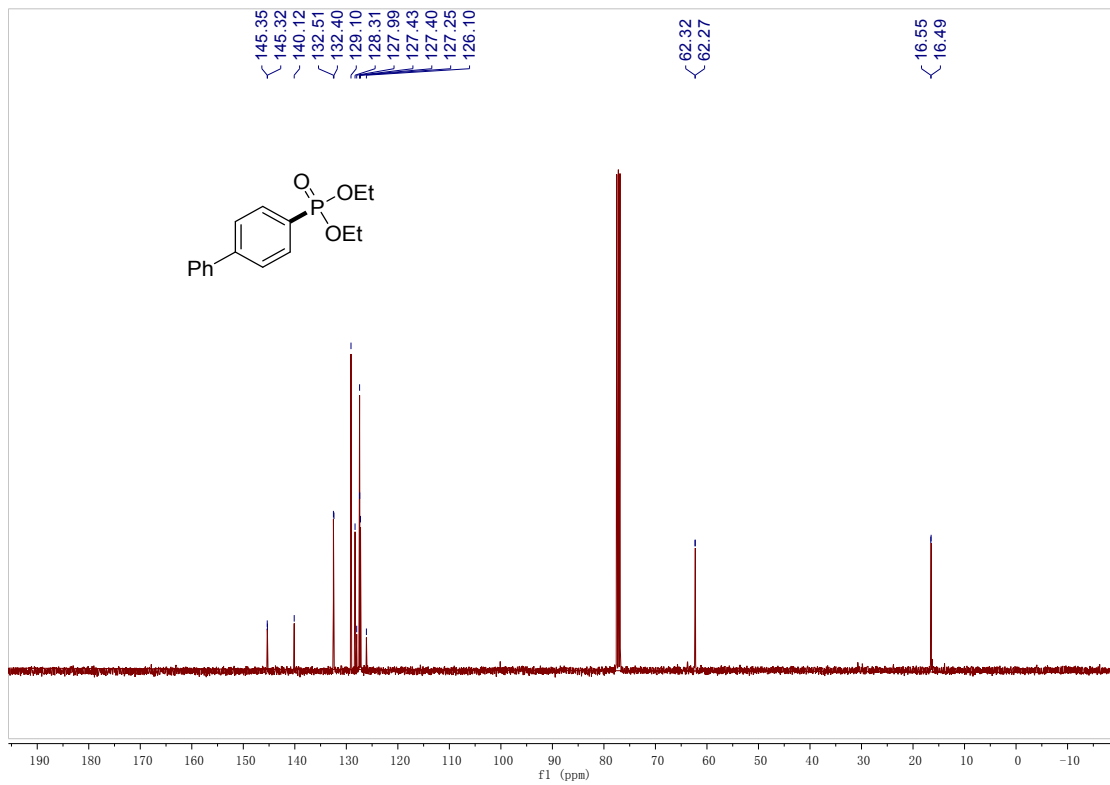

### <sup>1</sup>H NMR spectrum of compound **3i**

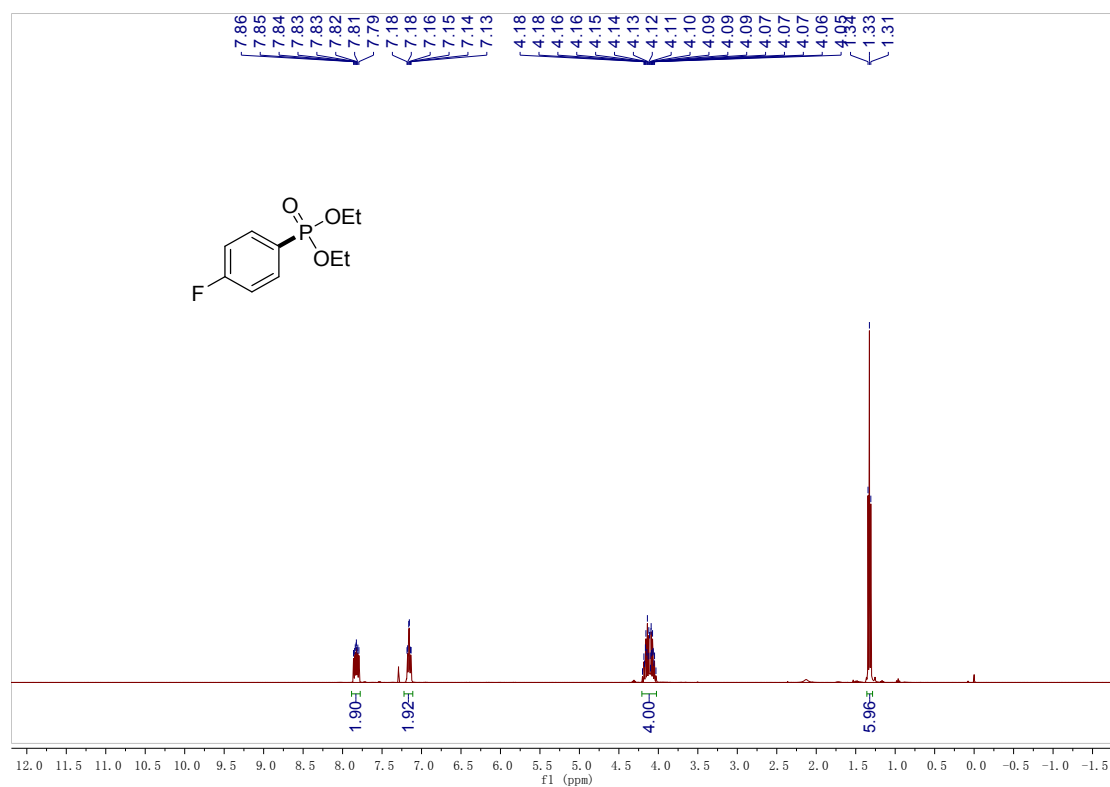

### <sup>13</sup>C NMR spectrum of compound **3i**

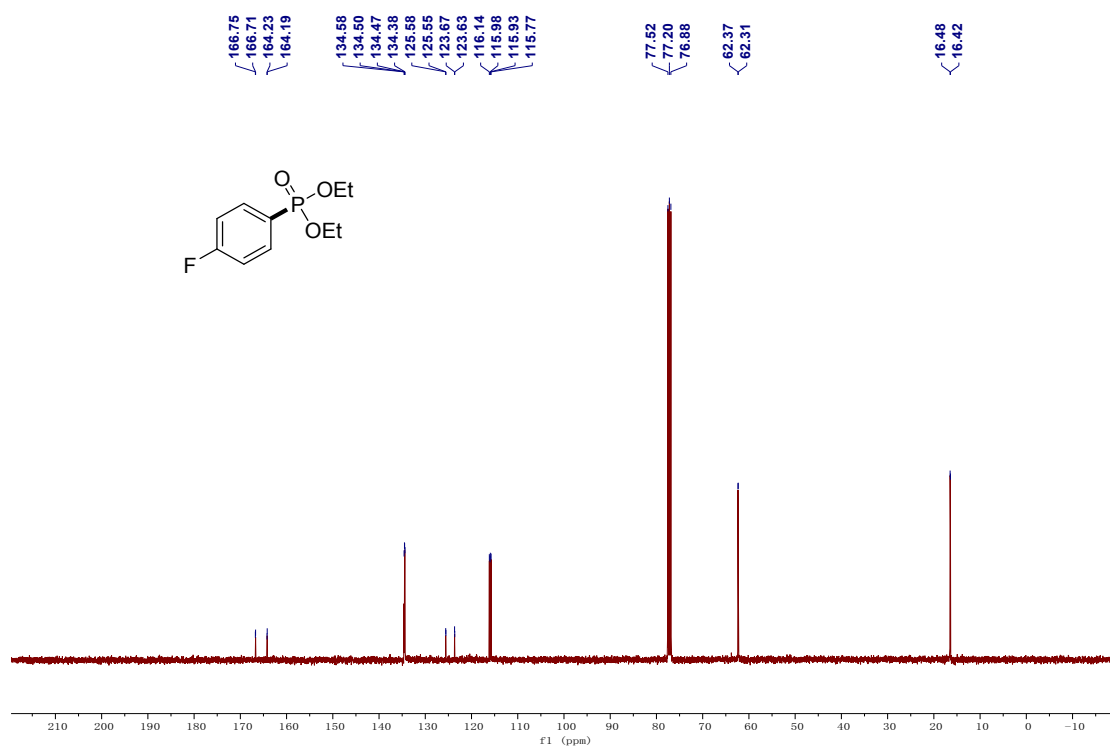

<sup>1</sup>H NMR spectrum of compound **3j**

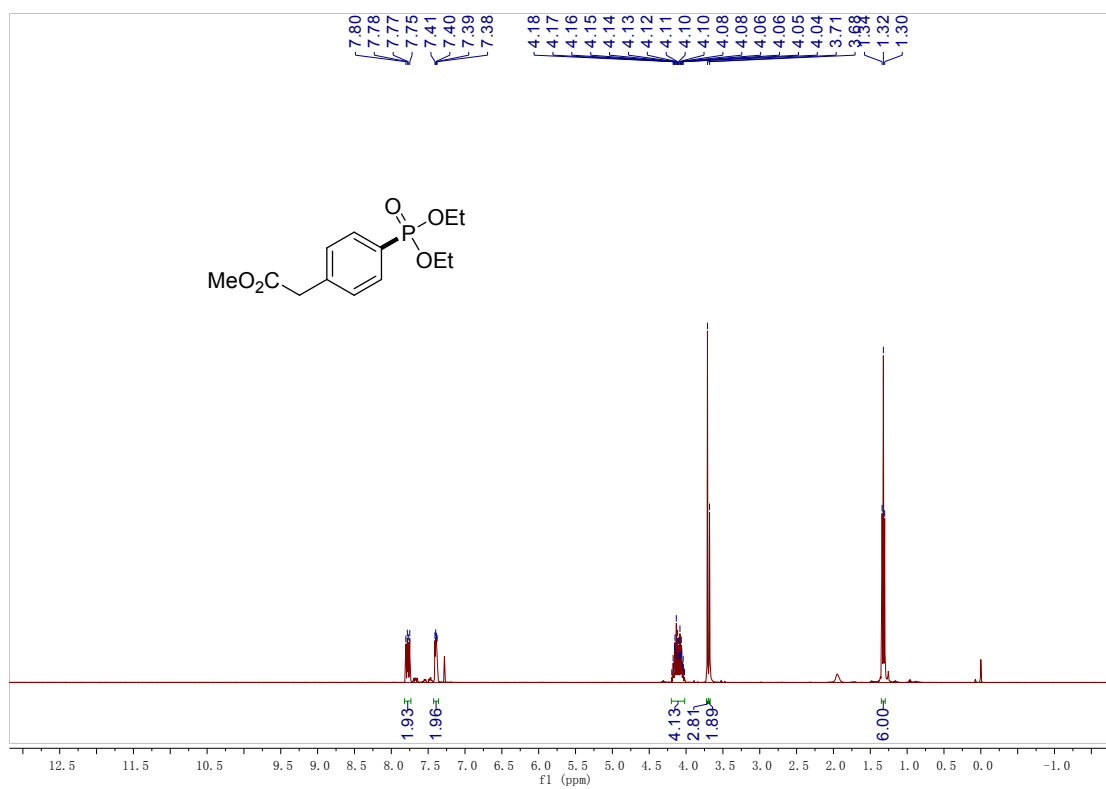

<sup>13</sup>C NMR spectrum of compound **3j**

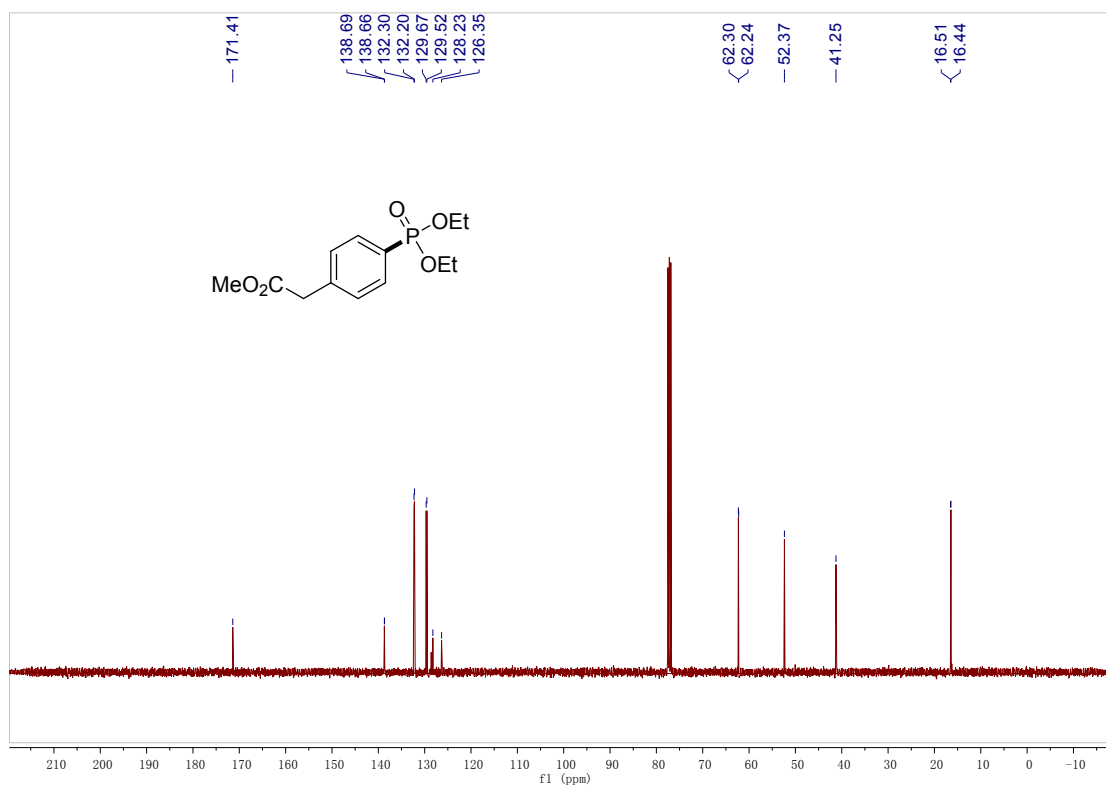

<sup>31</sup>P NMR spectrum of compound **3j**

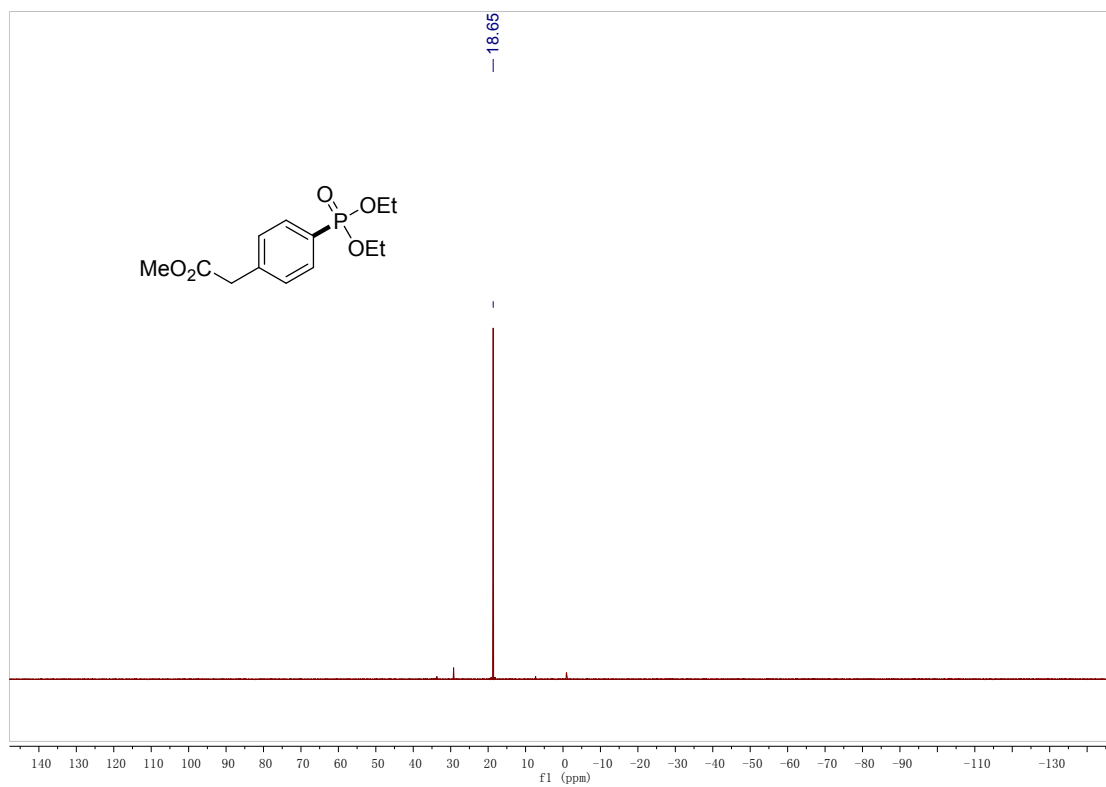

<sup>1</sup>H NMR spectrum of compound **3k**

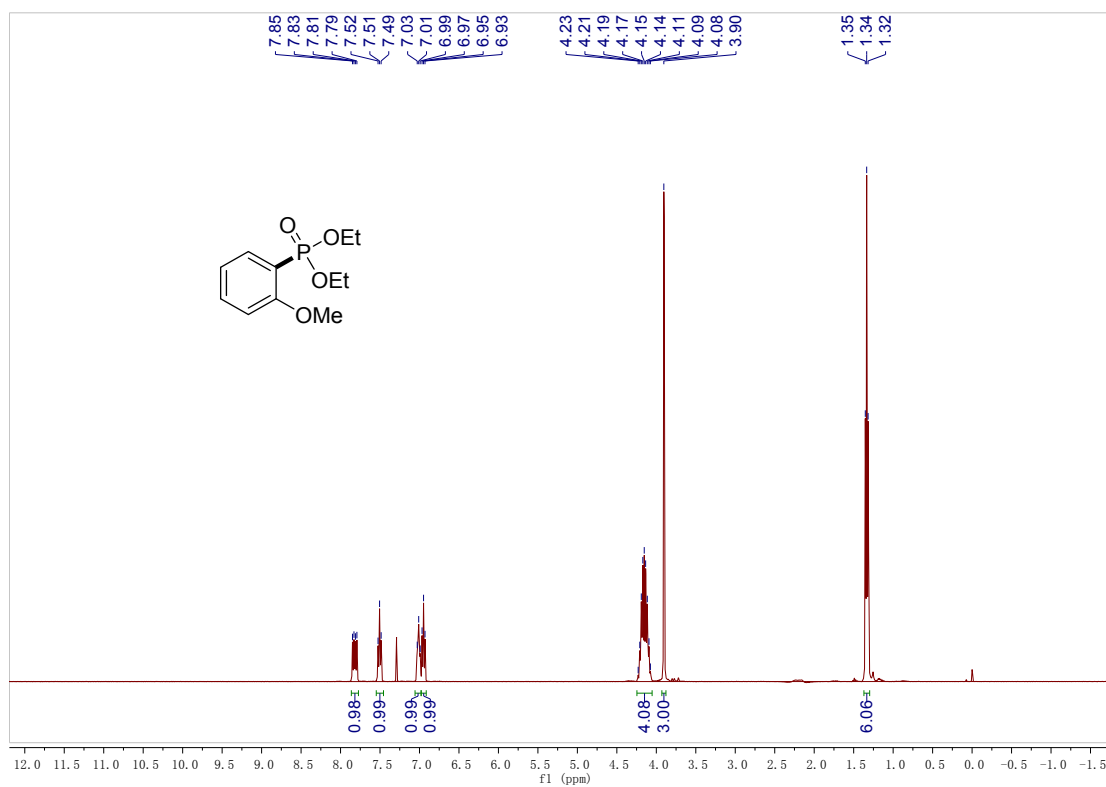

$^{13}\text{C}$  NMR spectrum of compound **3k**

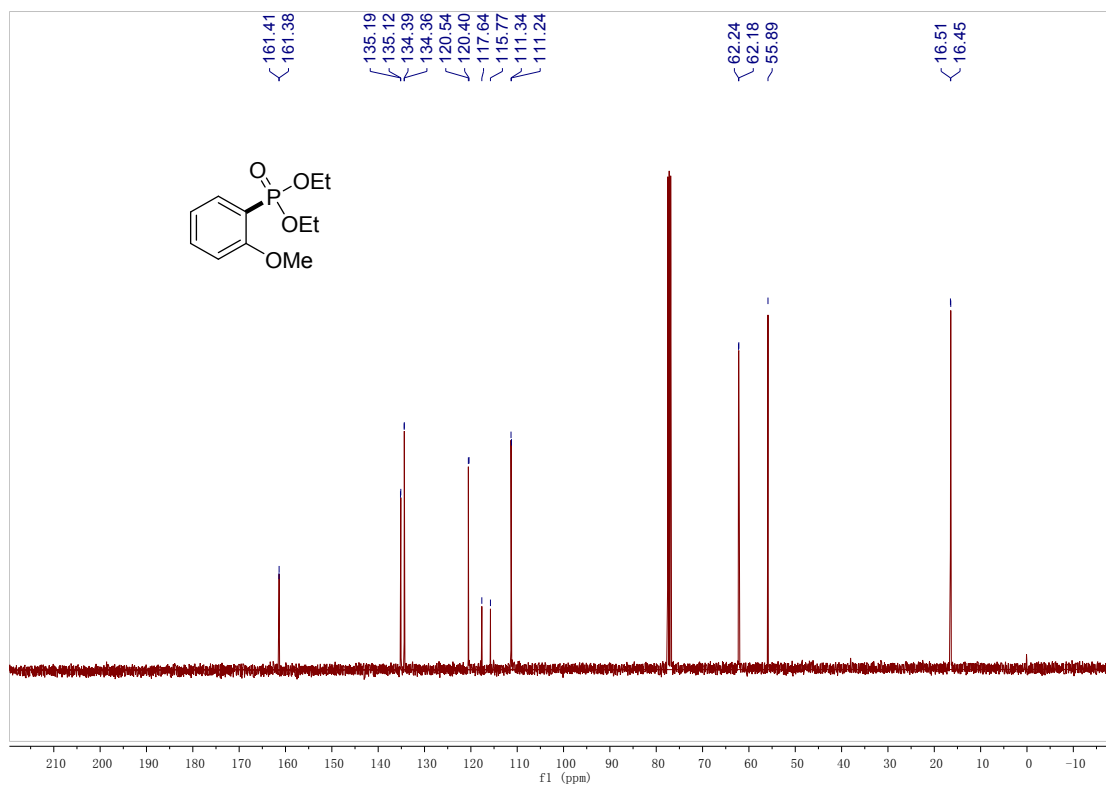

$^1\text{H}$  NMR spectrum of compound **3l**

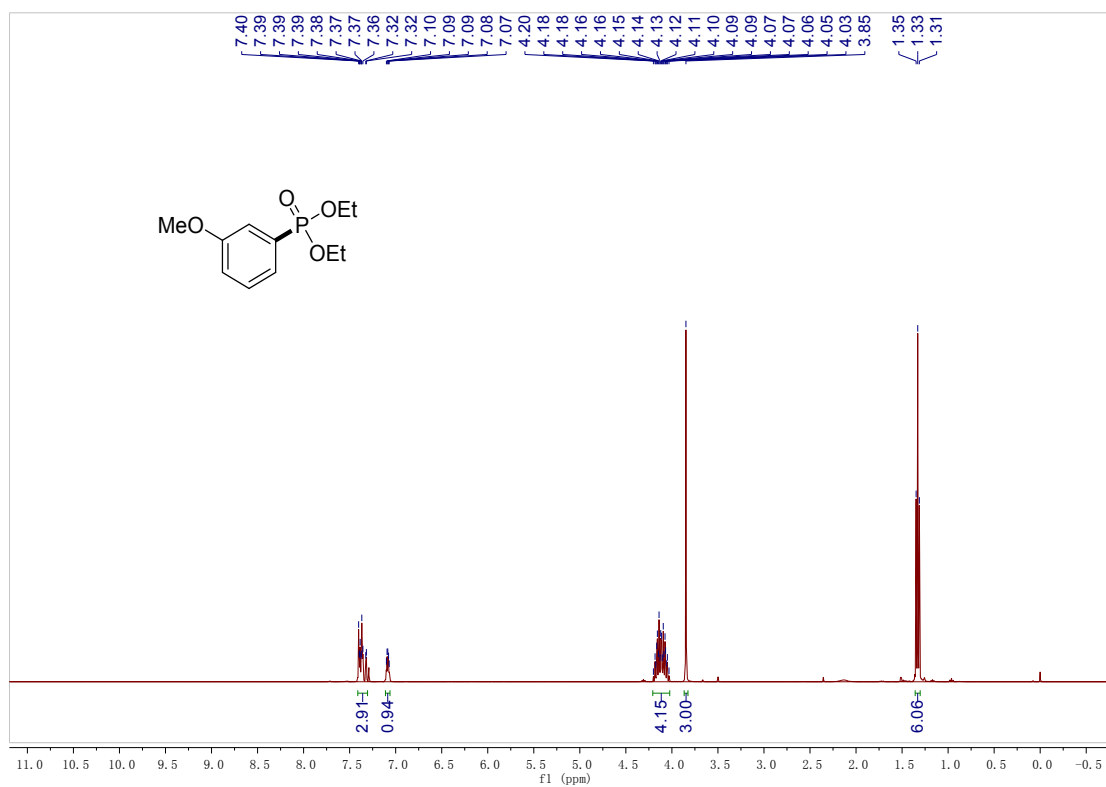

### $^{13}\text{C}$ NMR spectrum of compound **3l**

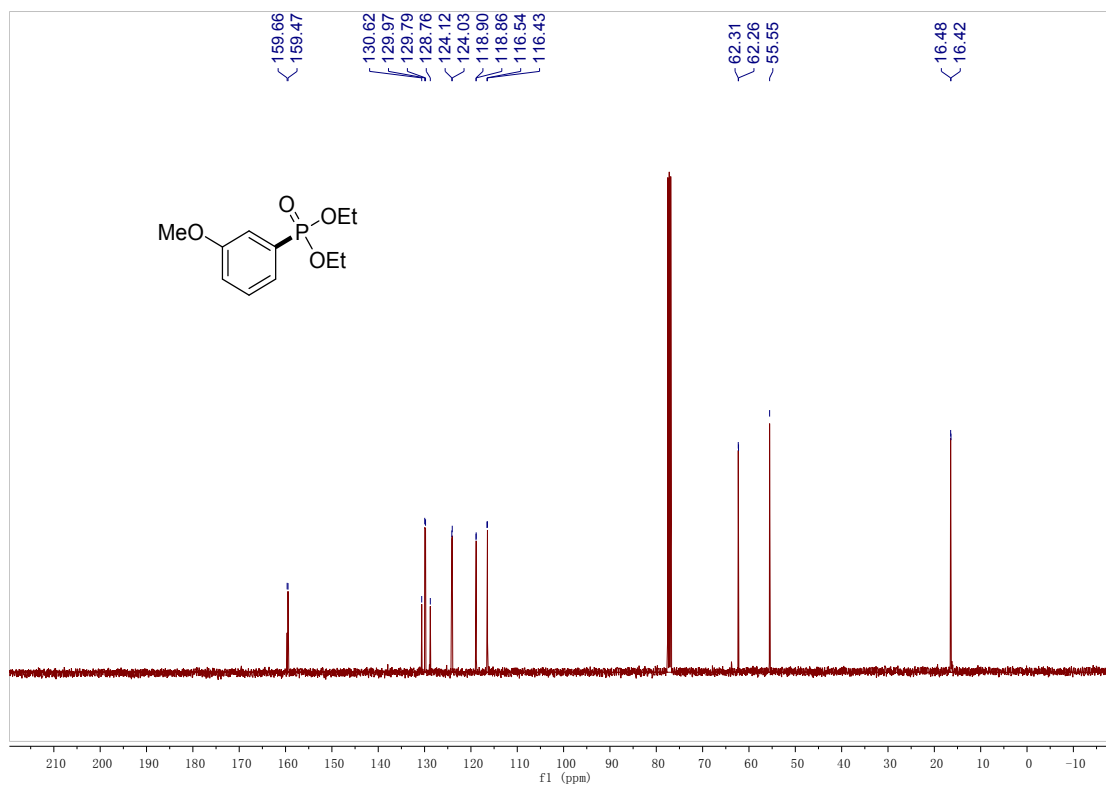

### $^1\text{H}$ NMR spectrum of compound **3m**

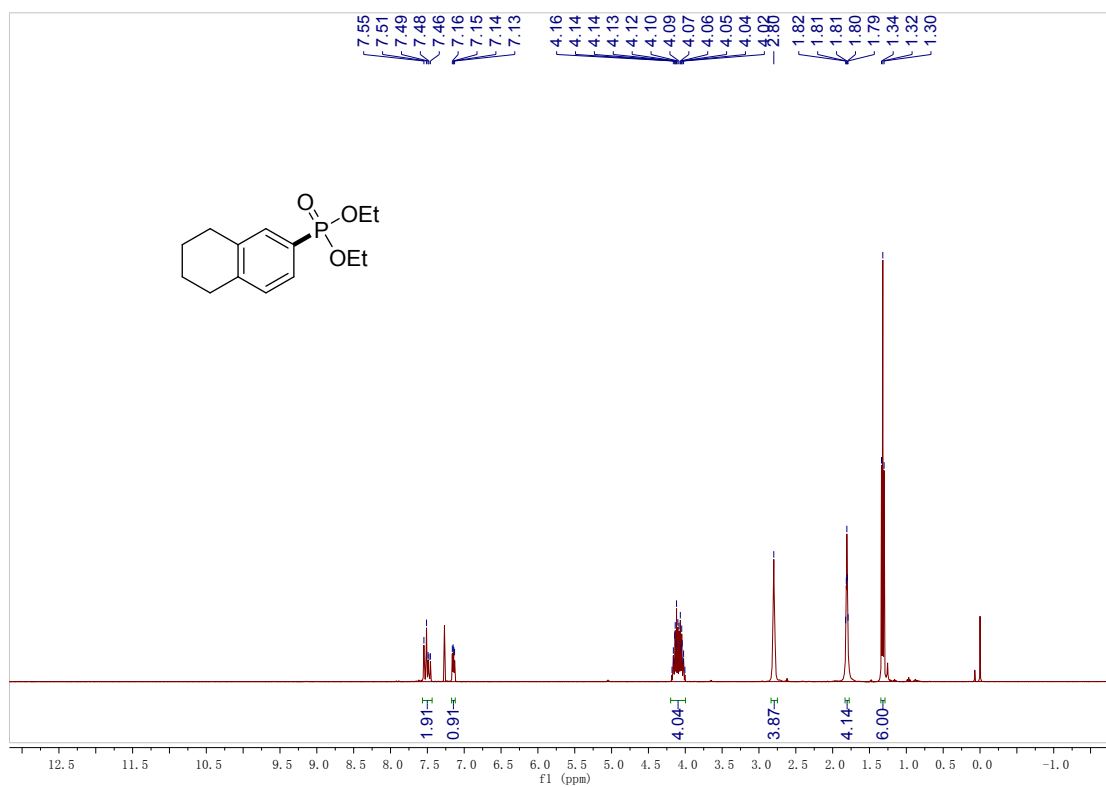



$^{13}\text{C}$  NMR spectrum of compound **3m**

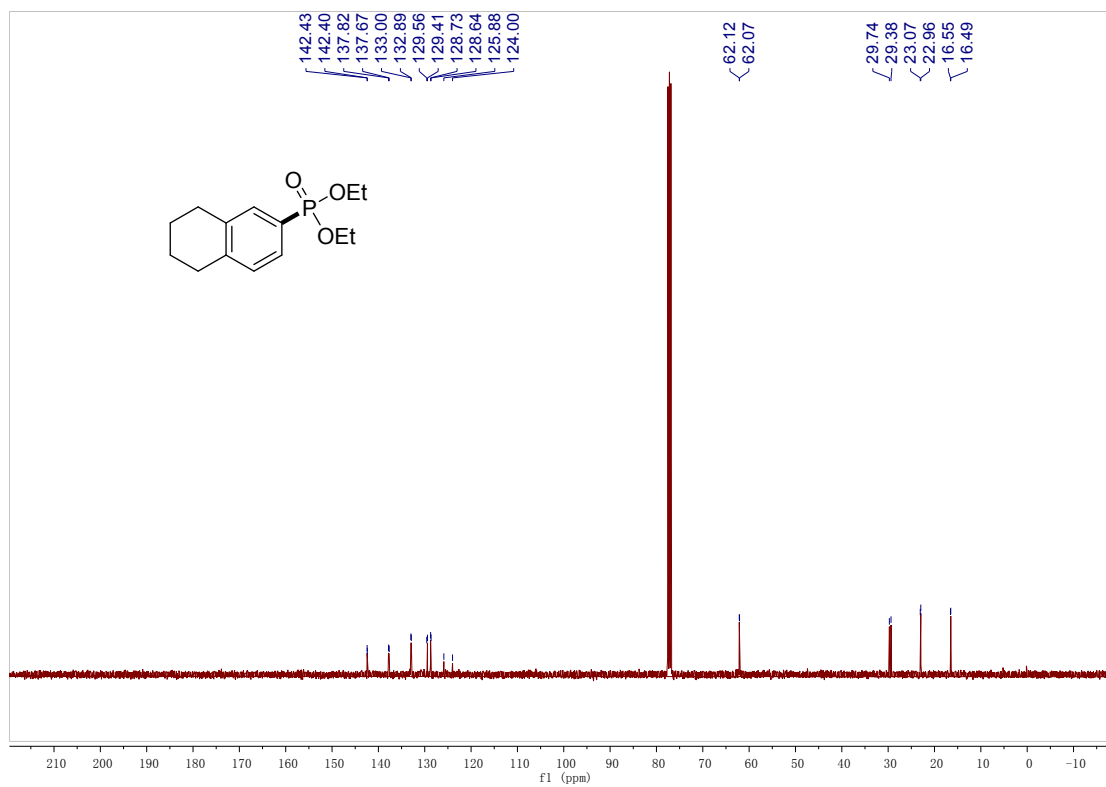

$^1\text{H}$  NMR spectrum of compound **3n**

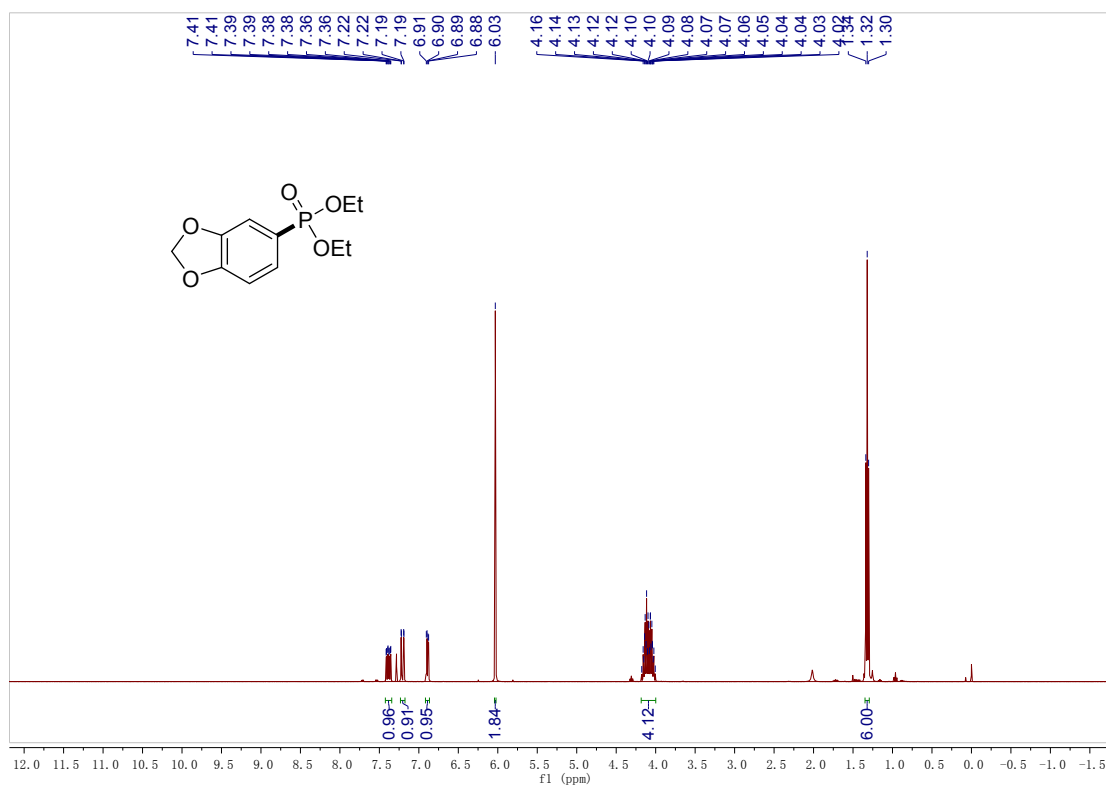

### <sup>13</sup>C NMR spectrum of compound **3n**

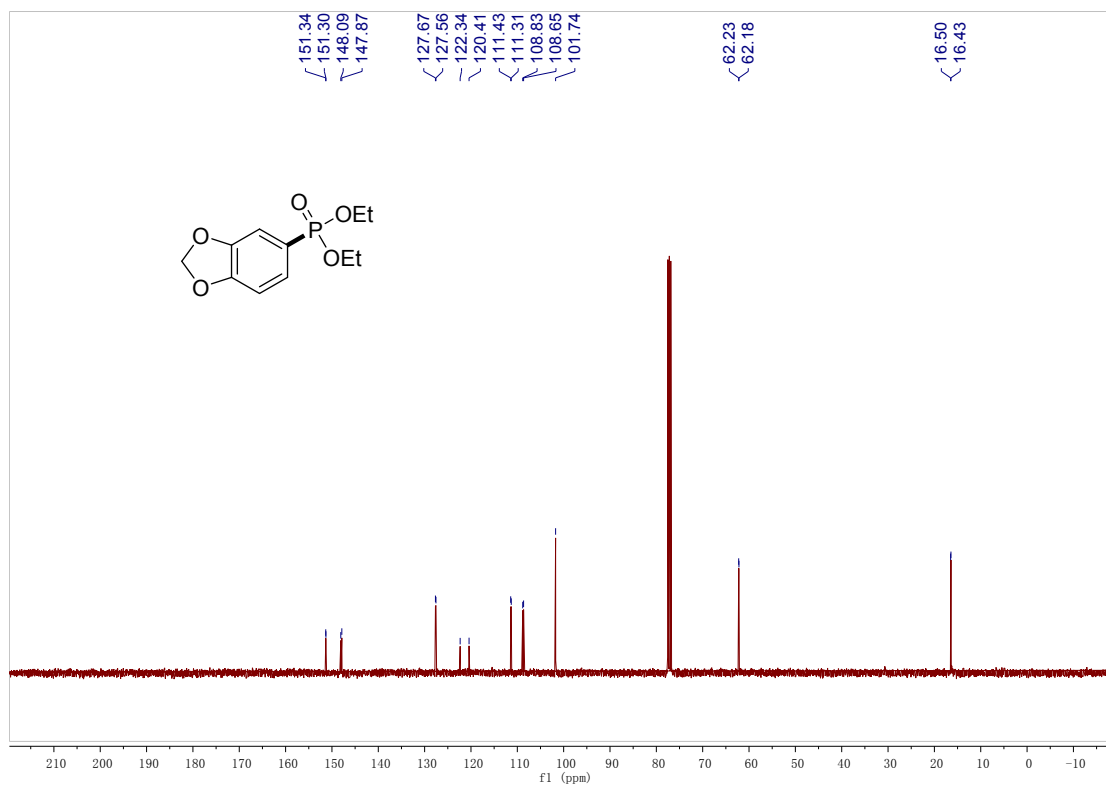

### <sup>1</sup>H NMR spectrum of compound **3o**

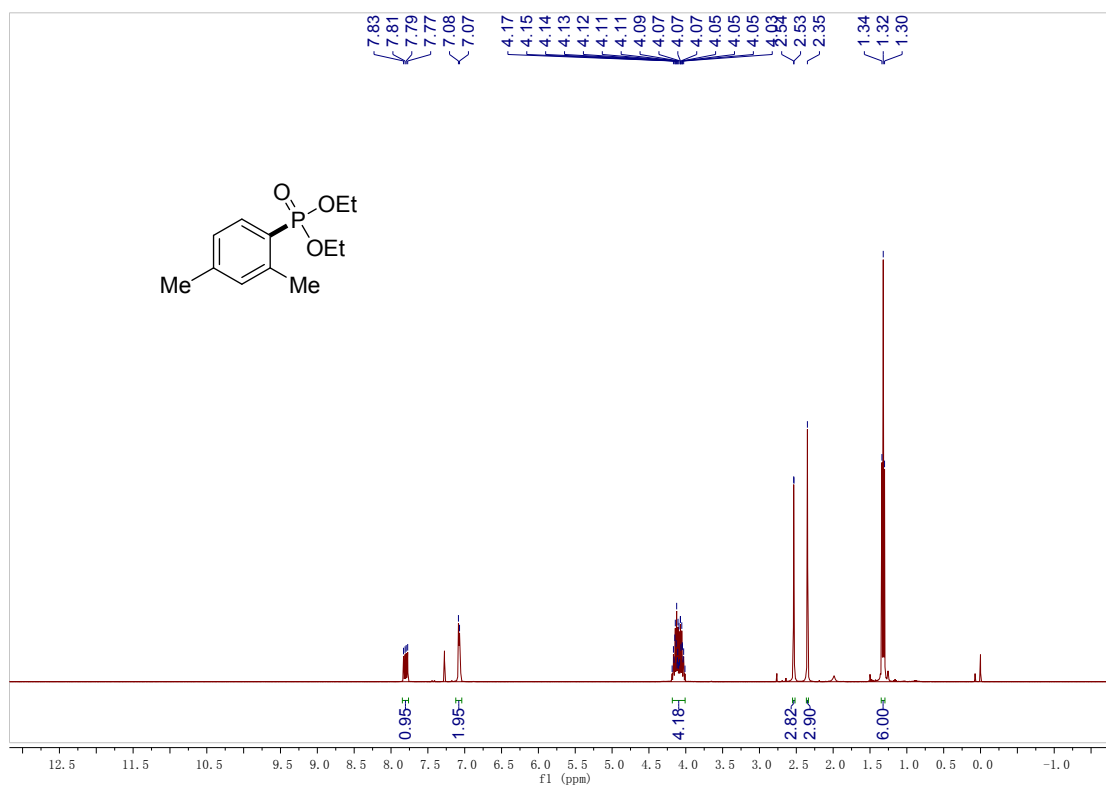

### <sup>13</sup>C NMR spectrum of compound **3o**

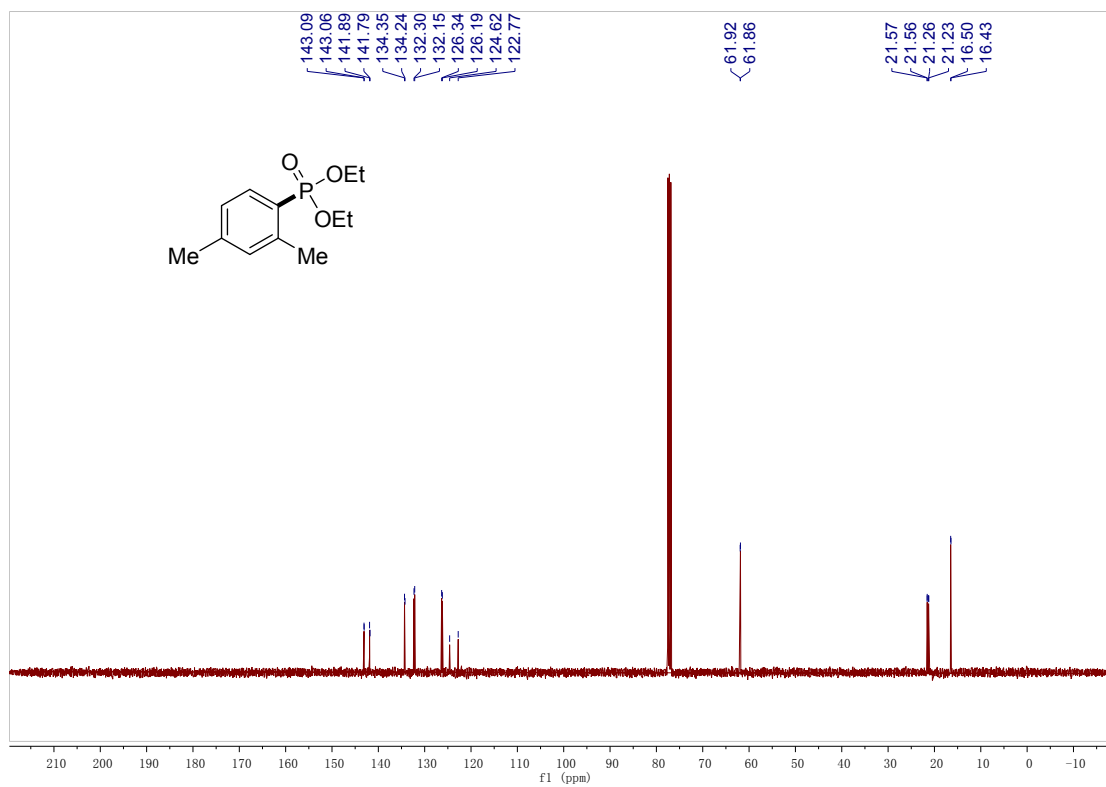

### <sup>1</sup>H NMR spectrum of compound **3p**

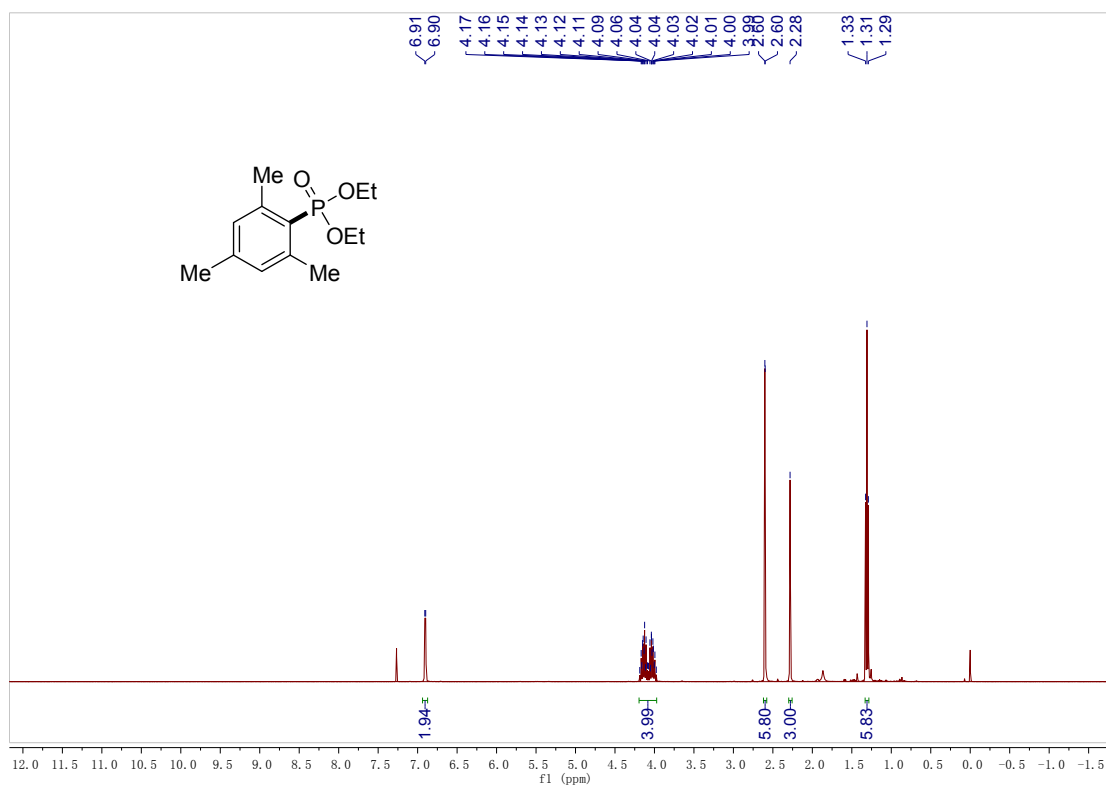

### <sup>13</sup>C NMR spectrum of compound **3p**

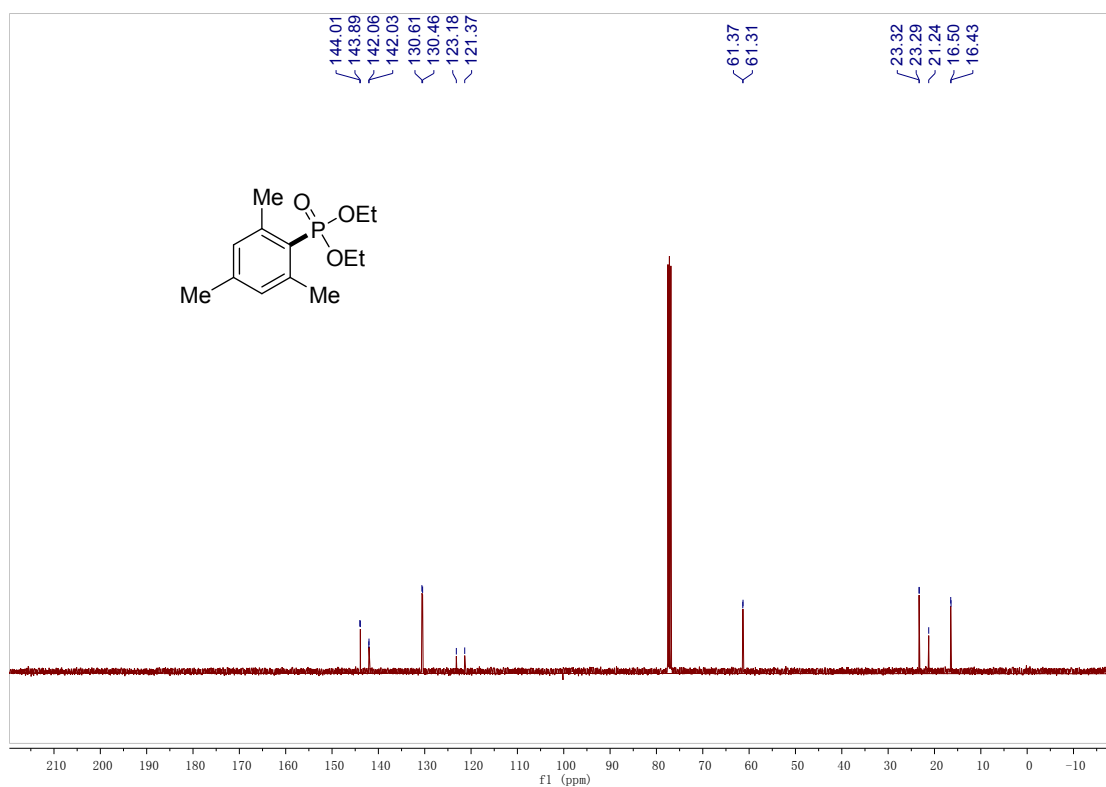

### <sup>1</sup>H NMR spectrum of compound **3q**

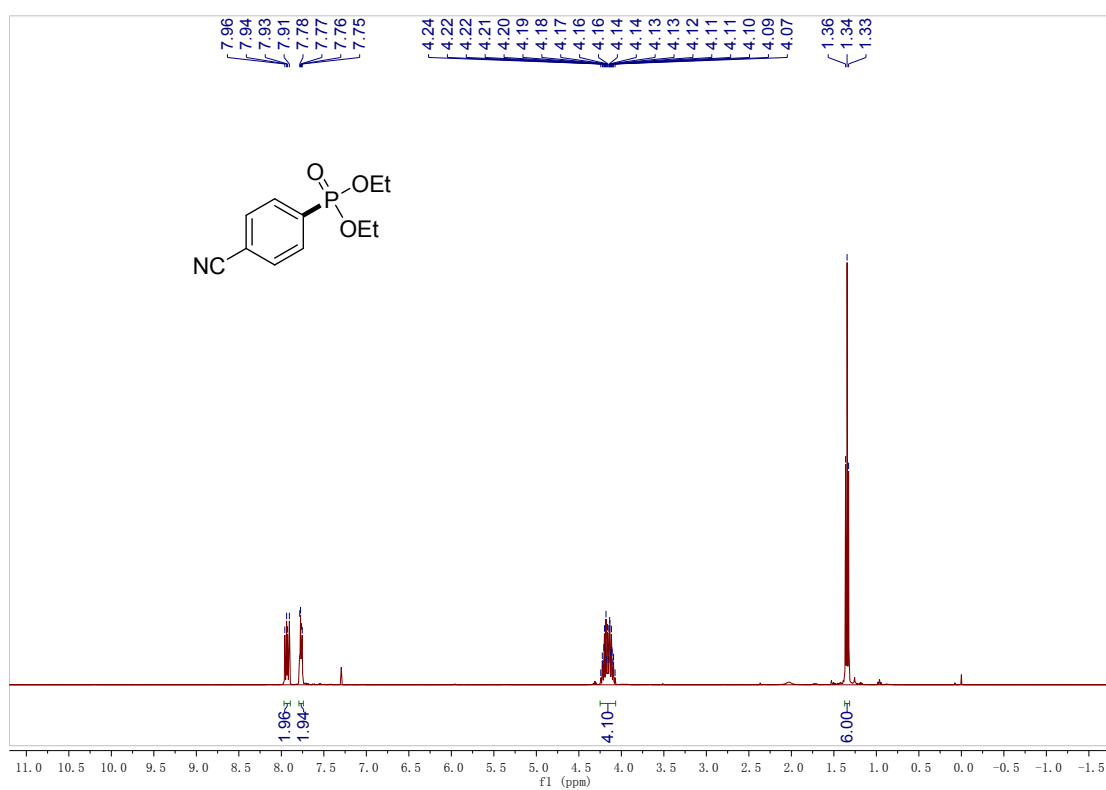

### <sup>13</sup>C NMR spectrum of compound **3q**

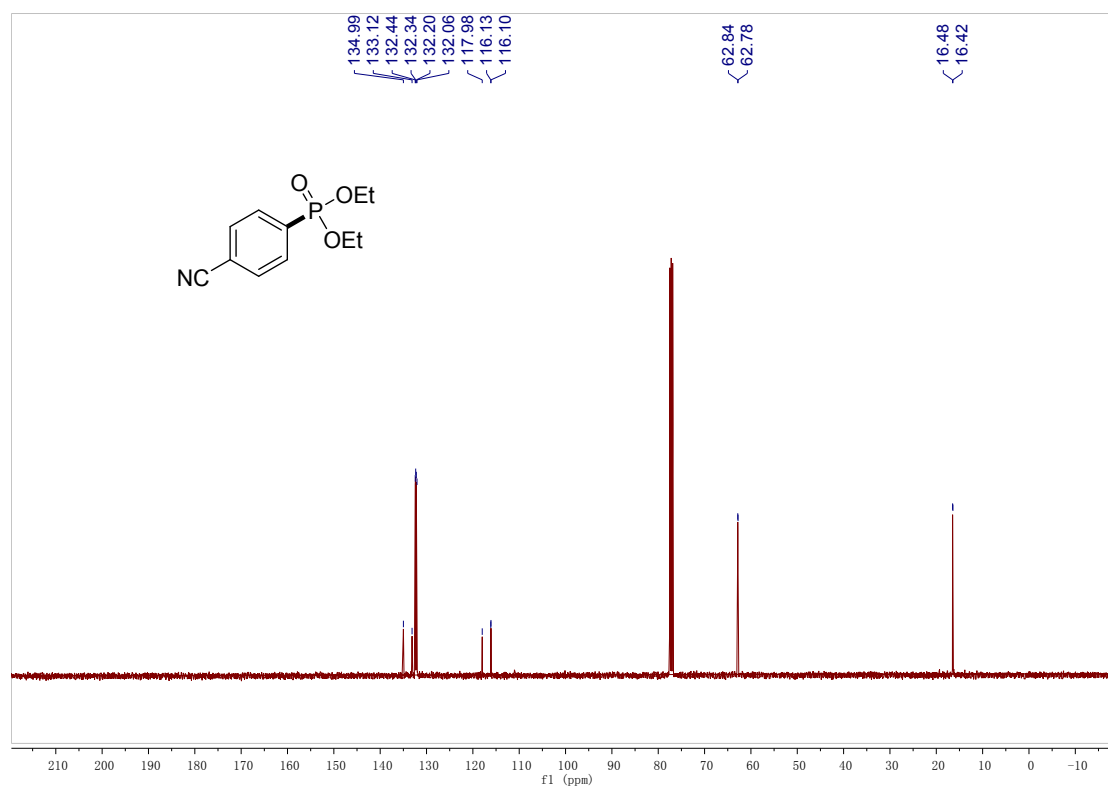

### <sup>1</sup>H NMR spectrum of compound **3r**

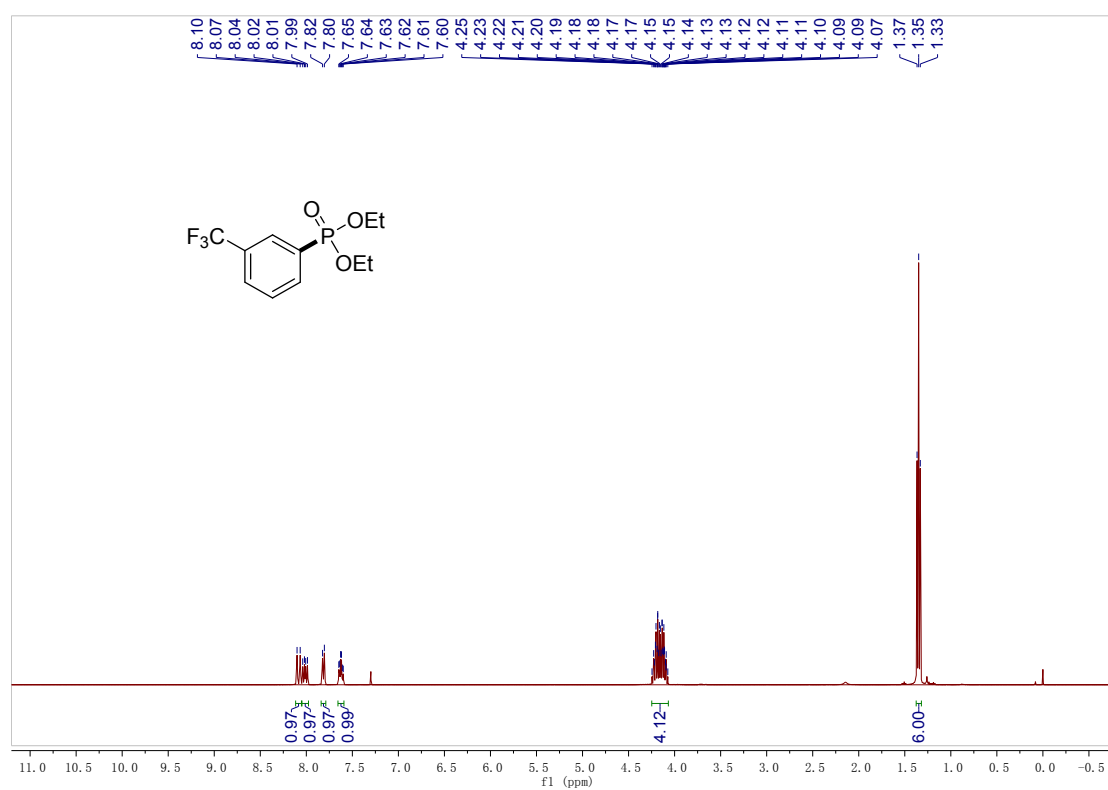

### <sup>13</sup>C NMR spectrum of compound **3r**

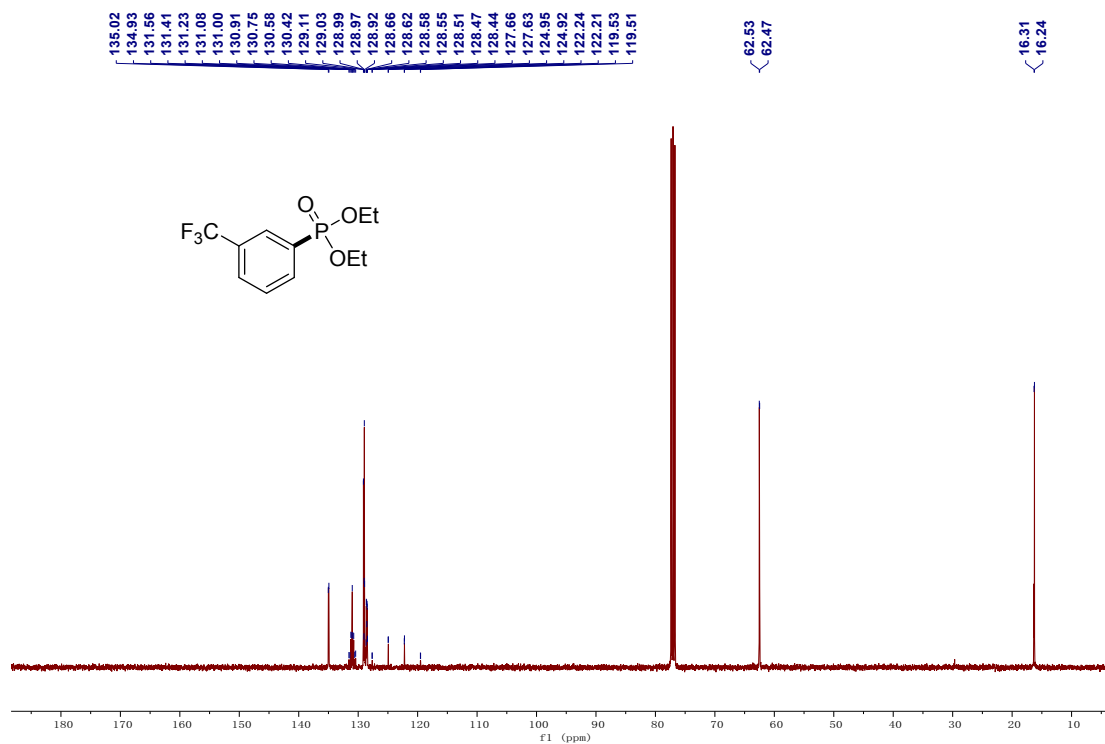

### <sup>1</sup>H NMR spectrum of compound **3s**

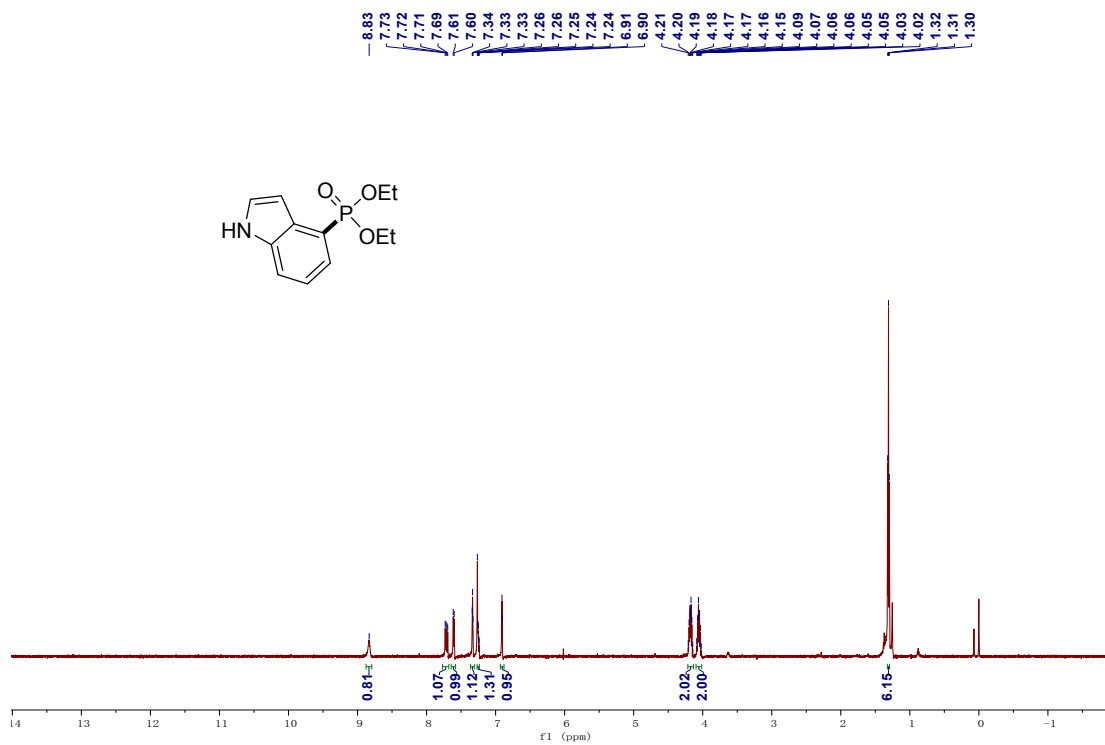

### <sup>13</sup>C NMR spectrum of compound 3s

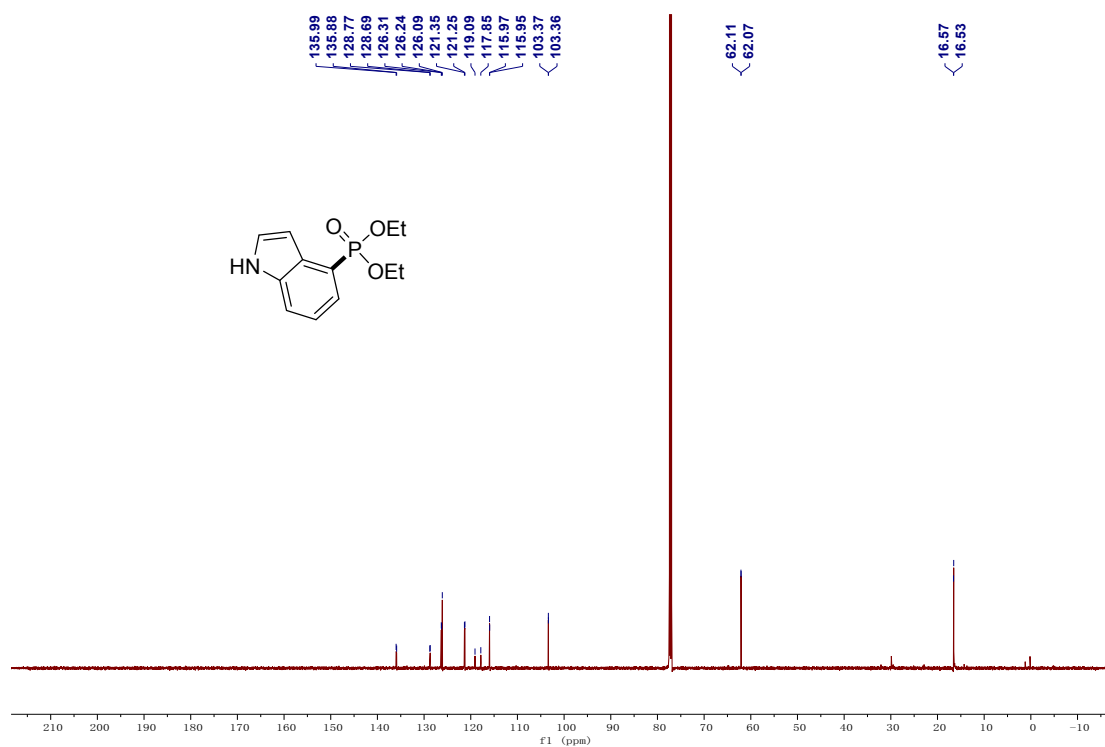

### <sup>31</sup>P NMR spectrum of compound 3s

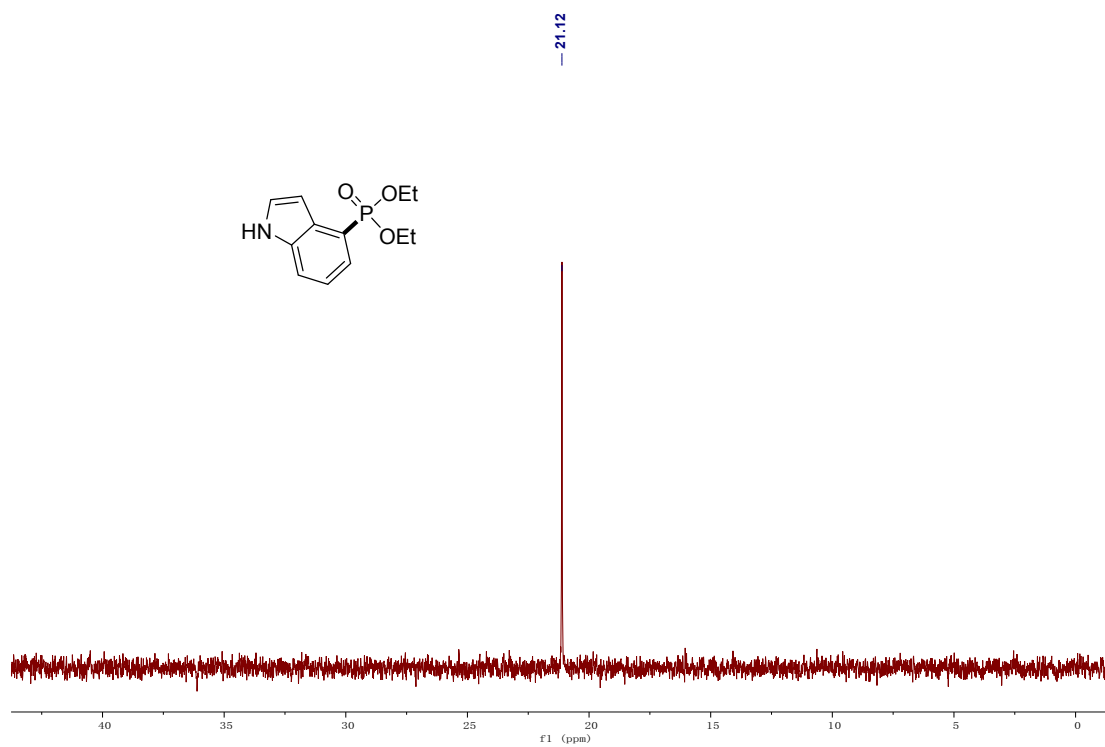

### <sup>1</sup>H NMR spectrum of compound 3t

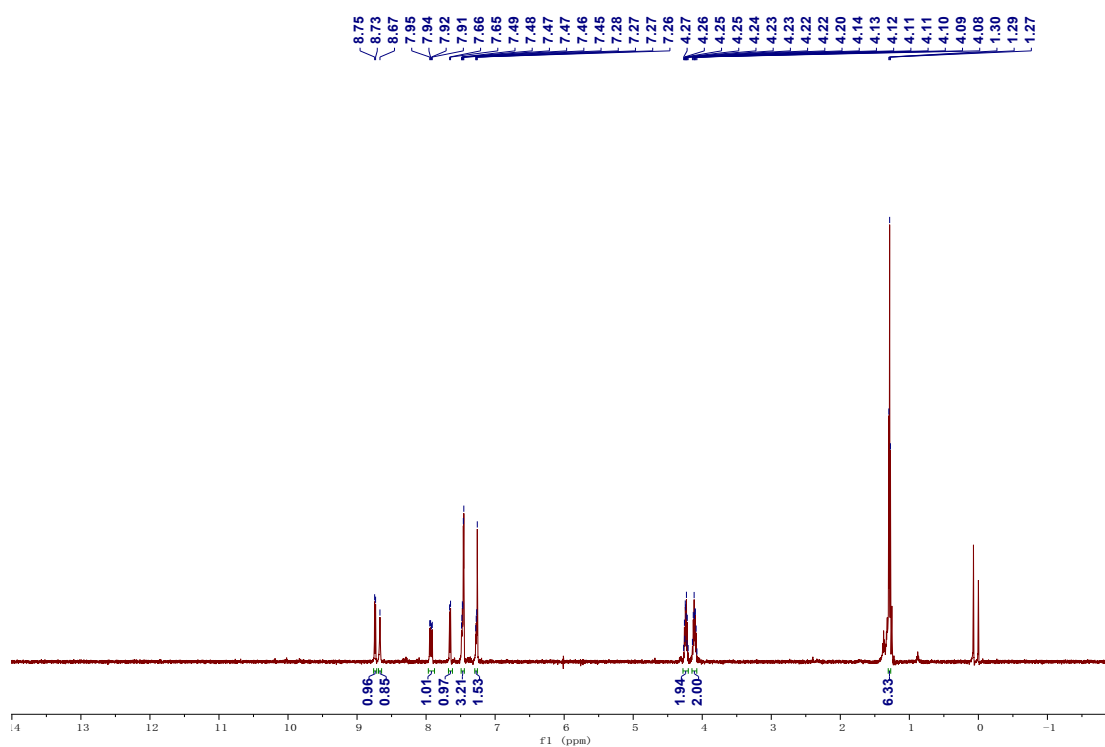

### <sup>13</sup>C NMR spectrum of compound 3t

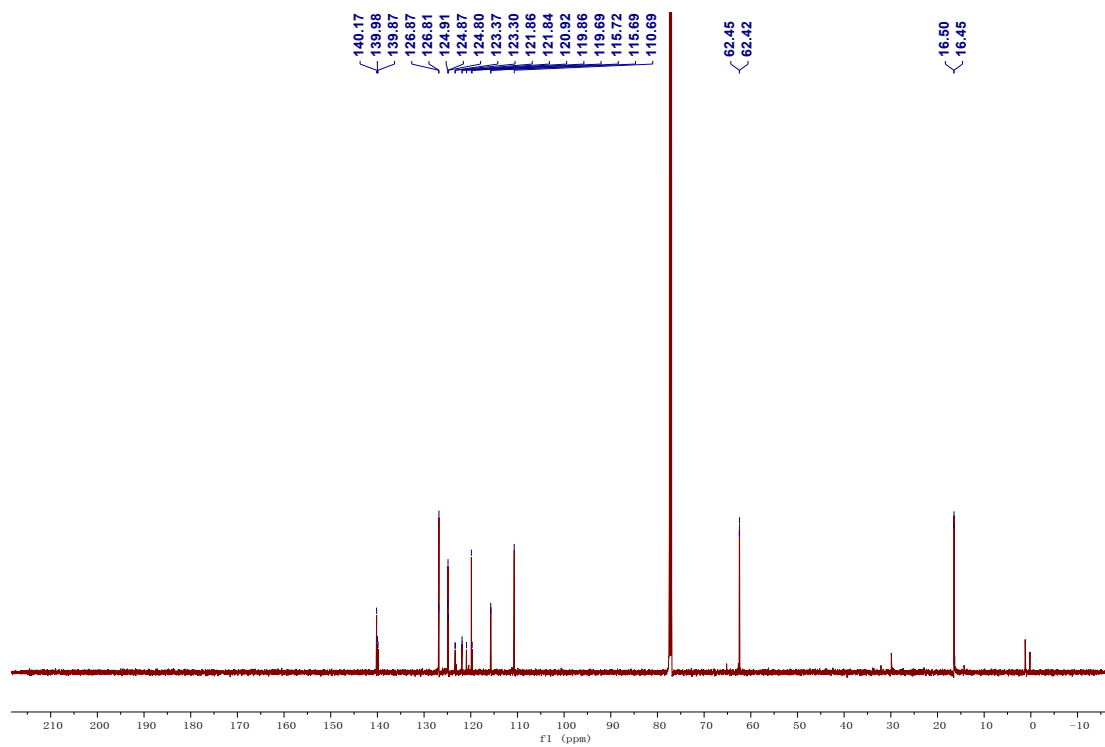



### $^{31}\text{P}$ NMR spectrum of compound **3t**

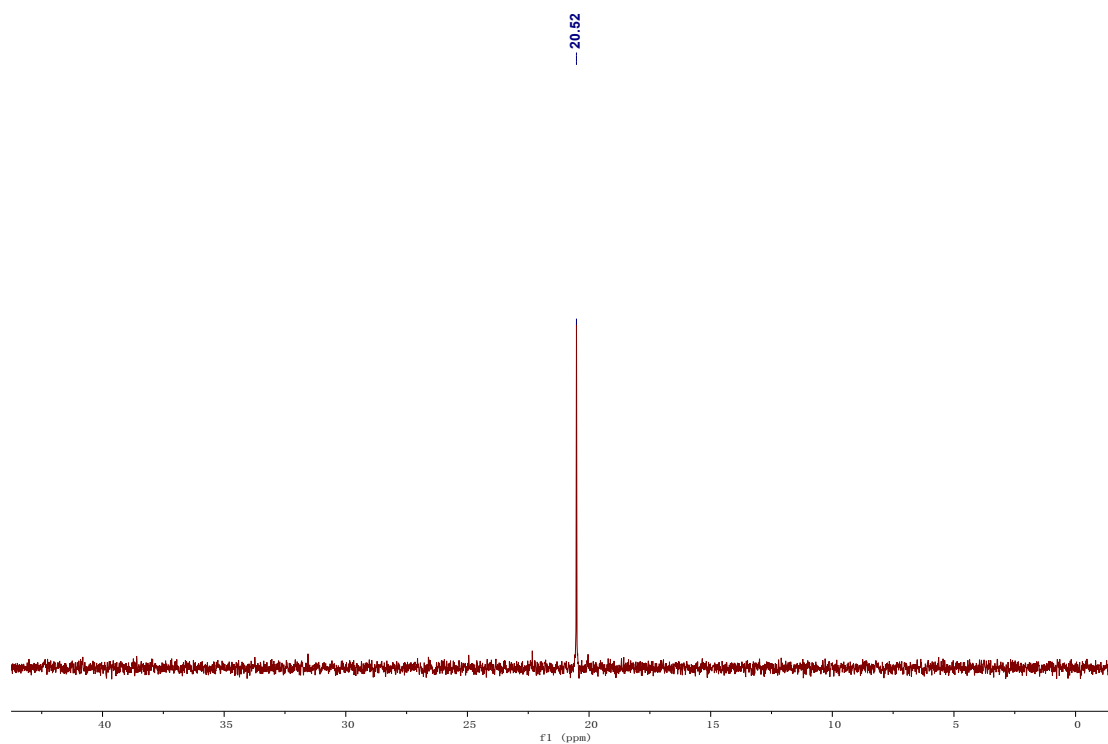

### $^1\text{H}$ NMR spectrum of compound **3u**

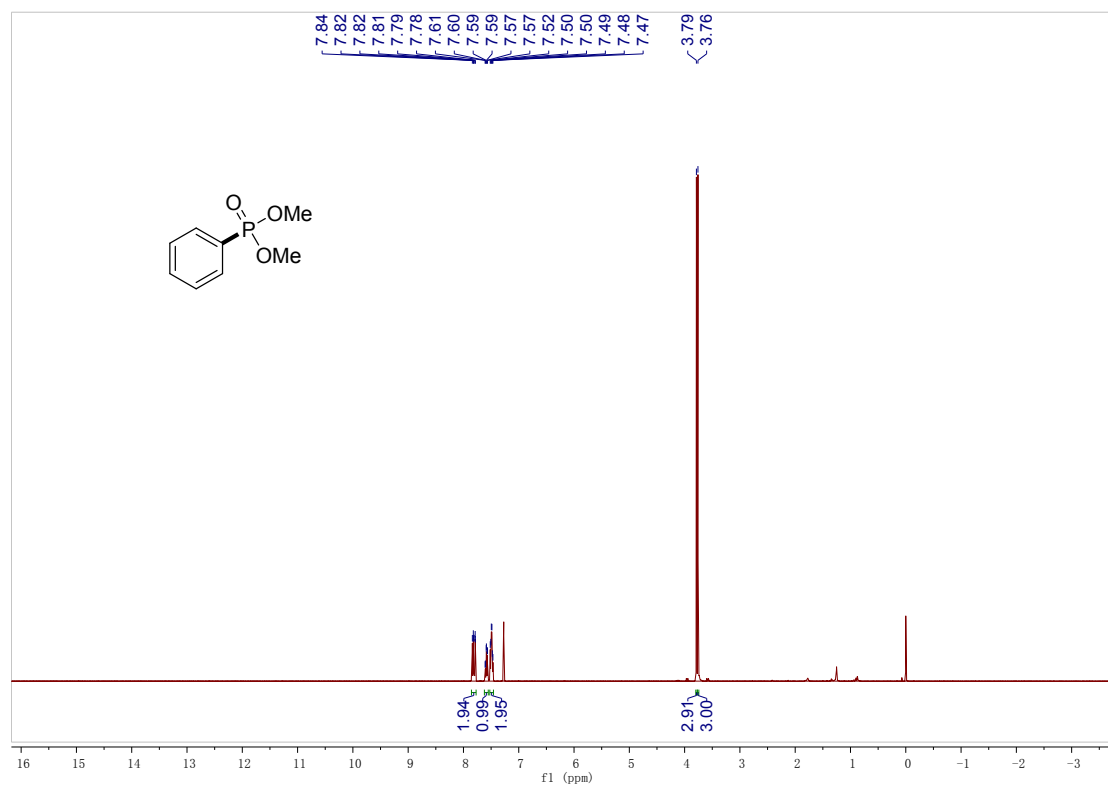

<sup>13</sup>C NMR spectrum of compound **3u**

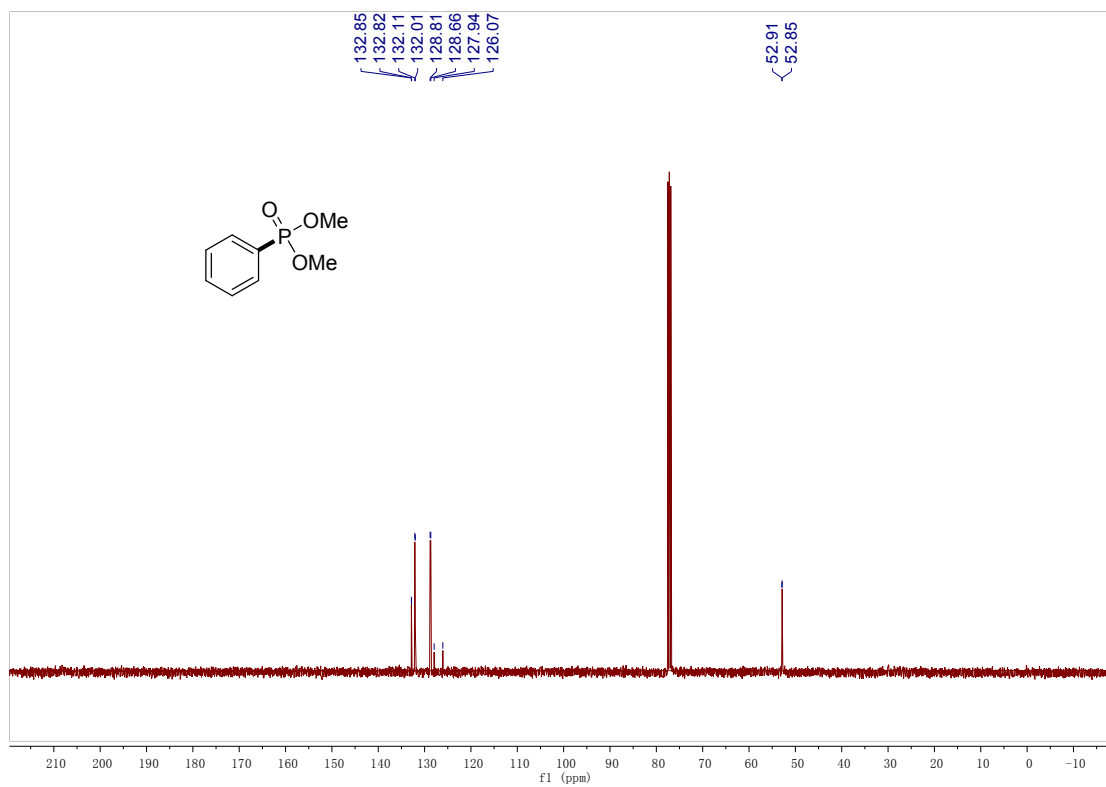

<sup>1</sup>H NMR spectrum of compound **3v**

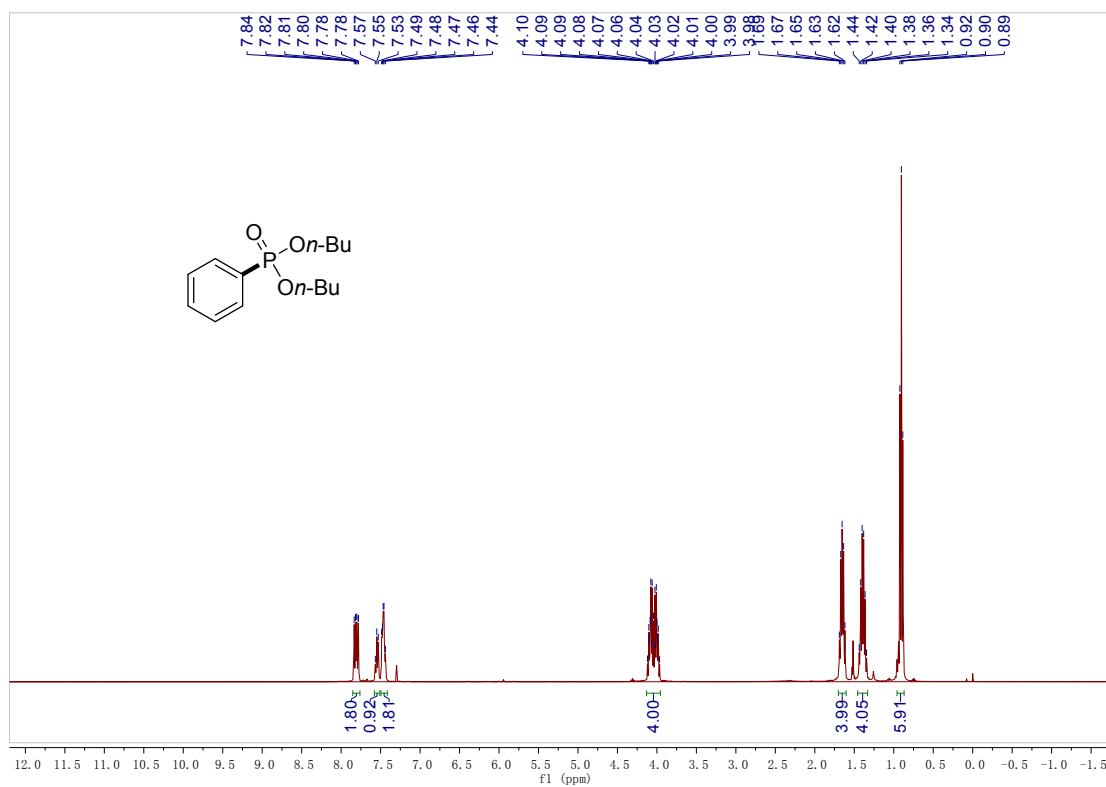

<sup>13</sup>C NMR spectrum of compound **3v**

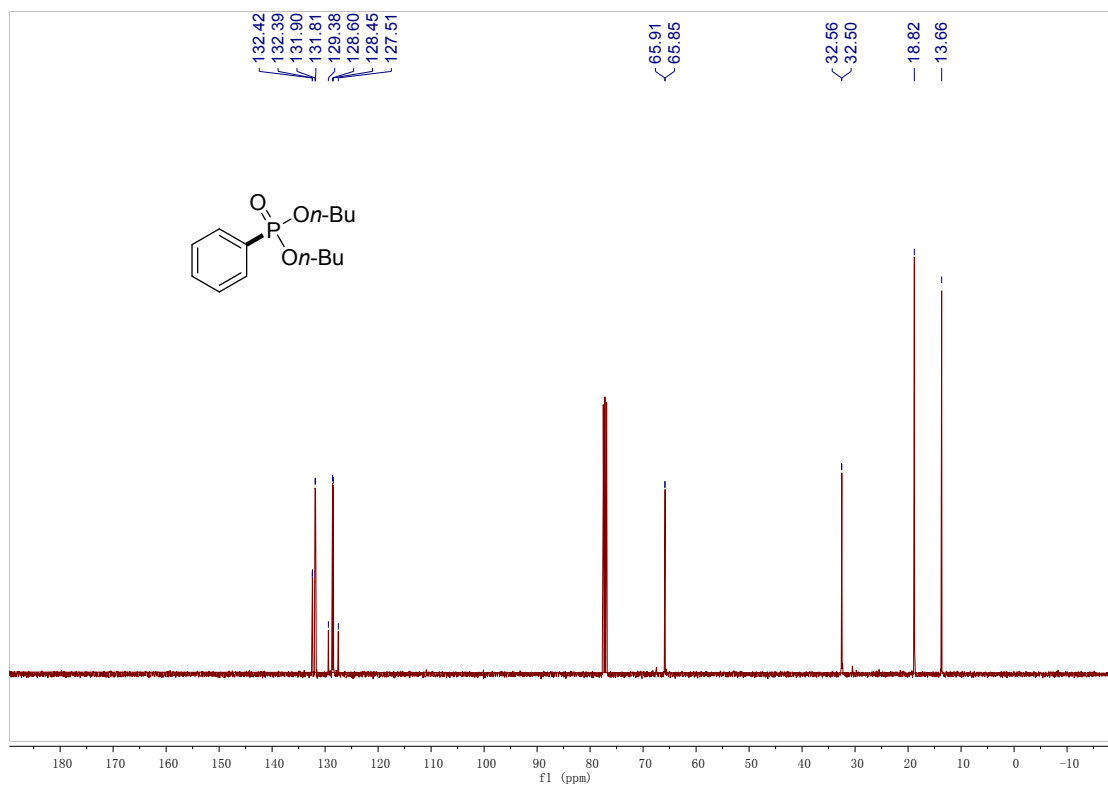

<sup>1</sup>H NMR spectrum of compound **3w**

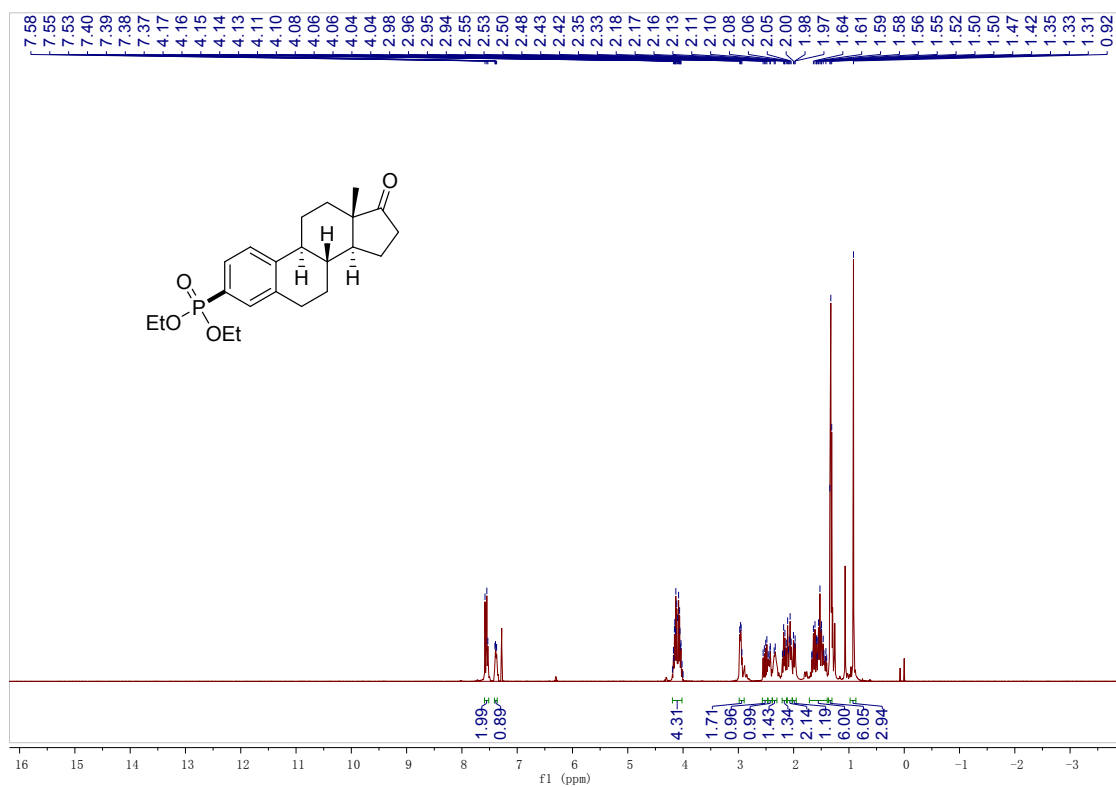



<sup>13</sup>C NMR spectrum of compound **3x**

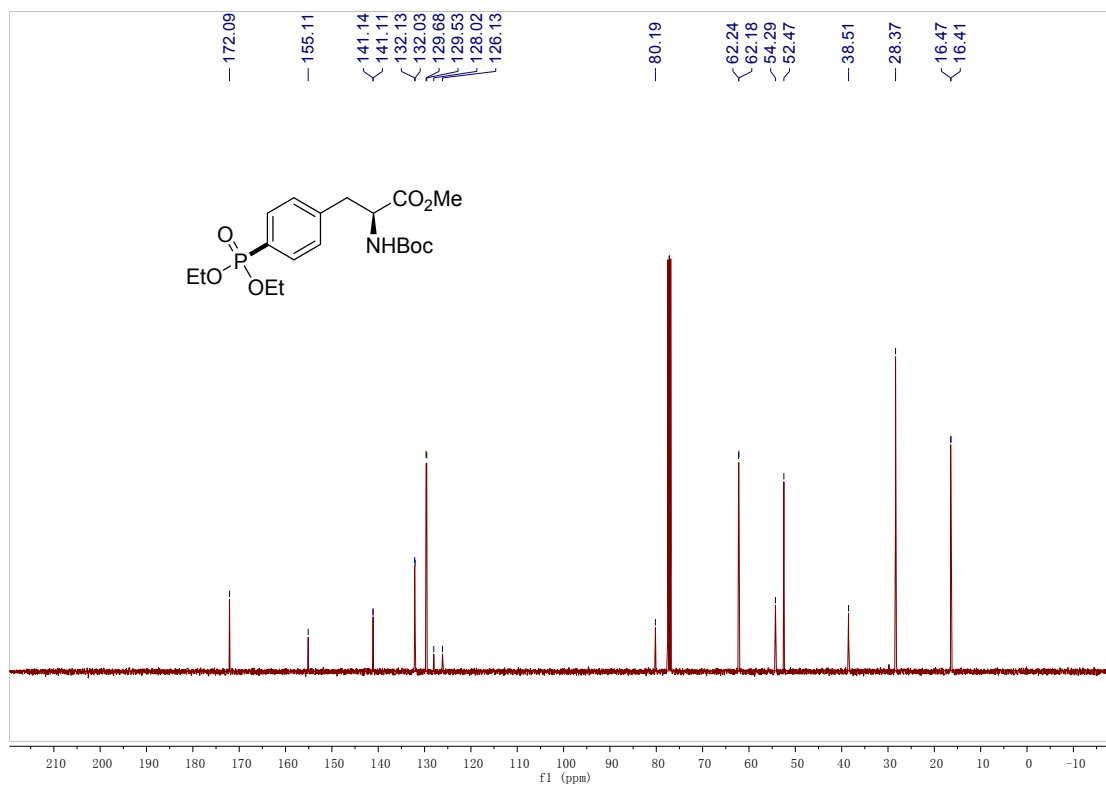

Supplement: d1cc03496k1.pdf [file d1cc03496k1.pdf]
